# Supplementary material
Source: PubMed Central journal article supplement (PMC3500435)
Supplement: NIHMS412126-supplement-1_si_001.pdf [file NIHMS412126-supplement-1_si_001.pdf]

Supporting Information for:

**Probing 2-Aminobenzimidazole Small Molecule Library-RNA Motif Interactions Via Two-Dimensional Combinatorial Screening**

Sai Pradeep Velegapudi <sup>1,2</sup>, Alexei Pushechnikov <sup>1</sup>, Lucas P. Labuda <sup>1</sup>, Jonathan M. French, and Matthew D. Disney <sup>2,\*</sup>

<sup>1</sup> *Department of Chemistry, The University at Buffalo, The State University of New York, Buffalo, New York 14260*

<sup>2</sup> *The Kellogg School of Science and Engineering, The Department of Chemistry, The Scripps Research Institute, Scripps Florida, 130 Scripps Way #3A1, Jupiter, FL 33458*

| <b>Table of Contents:</b>                                      | <b>Pages</b> |
|----------------------------------------------------------------|--------------|
| 1. Synthesis of libraries used for microarray screening        | 2-9          |
| 2. Spectroscopic characterization of the synthesized compounds | 10-37        |
| 3. Screening of Small molecule libraries via microarray        | 38           |
| 4. RNA-PSP analysis: Sum Z-scores for <b>ABI – ABV</b>         | 39-49        |
| 5. References                                                  | 50           |

## Section I: Synthesis of Libraries used in microarray screening

**I(a) Synthesis of 2-aminobenzimidazole library:** The library with the 2-(arylamino)benzimidazole scaffold was synthesized via the solid-phase approach. Initially an azidopropylamine modified resin **35** (Scheme S-1) was synthesized in a common reaction flask, and then it was split into individual vials for further modifications.

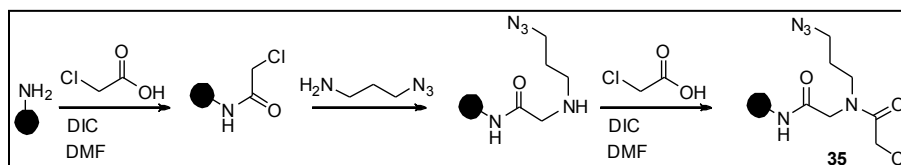

**Scheme S-1:** Synthesis of azido-propylamine-modified resin

The resin-bound benzimidazole library was synthesized according to previously described approach (Scheme S-2). (1, 2) The utilized building blocks are presented in Figure 1.

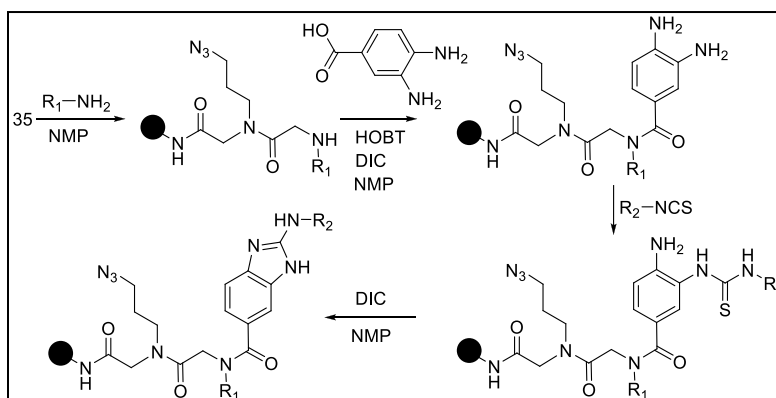

**Scheme S-2:** Synthesis of 2-aminobenzimidazole library

Vials were charged with the azide-modified resin **35** (15 mg, 10  $\mu$ mol) and installed into the heating block. In the vials solutions of corresponding amines  $R^1NH_2$  (0.35 mL, 1M in NMP) were

loaded, and the displacement was carried out at 50 °C for 20 h, while shaken at 75 rpms. The liquids were evacuated; the beads were washed with DMF at 28°C, while shaking for 20 min at 150 rpm (2×1 mL), followed by wash with ethyl acetate (1.5 mL). Then, a solution of 3,4-diaminobezoic acid (0.8 g, 5.3 mmol), N-hydroxybenztriazole (0.85 g, 6.3 mmol), and DIC (1.9 mL, 12 mmol) in NMP (23 mL) was distributed into each vial (0.35 mL). The reaction was carried out at 37 °C for 36 h, while shaking at 75 rpm. The liquids were evacuated, and the beads were washed with DMF at 28 °C, while shaking for 20 min at 150 rpm (2×1 mL), followed by the wash with ethyl acetate (1.5 mL). Then into each vial NMP (0.35 mL), corresponding isothiocyanate R<sup>2</sup>NCS (8 eq) and N,N-diisopropylethylamine (20 µl) were loaded. The reaction was carried out at 37°C for 20 h (shaking speed 75 rpm). The liquids were evacuated, the beads were washed with DMF at 28°C shaking for 20 min at 150 rpm (2×1 mL) ), followed by the wash with ethyl acetate (1.5 mL). Then, into each vial 0.5 M DIC in NMP (0.5 mL) was loaded and the reactions were carried out at 37 °C for 20 h, while shaking at 75 rpm. The liquids were evacuated, the beads were washed with DMF at 28°C shaking for 20 min at 150 rpm (2×1 mL) ), followed by the wash with ethyl acetate (1.5 mL). Reaction wells were further washed with 20% piperidine in DMF (1 mL, 1 h), and again with DMF, and ethyl acetate. The product was cleaved from the resin with a TFA/DCM/water mixture (60:40:2) at 28°C for 5 h, while shaking at 75 rpm. Liquids were separated and beads were washed with methanol (1 mL). Combined filtrates were evaporated under stream of air. The residues were dissolved in methanol (1 mL), and aliquots were taken for MS-ESI analyses, and the solutions were evaporated again. The samples were then dissolved in 1.2 mL of a methanol-water-glycerol (1:1:1, v/v/v) mixture, providing approximately 5.5 mM concentration. Out of 91 reactions, 79 compounds were successfully synthesized.

**I(b) General Protocol for Peptoid Synthesis:** The synthesis of peptoid library was accomplished using solid-phase methodology (Scheme S-4) as described by Zukermann *et al.*,<sup>(3)</sup> and various primary amines were utilized as the sub-monomers at the displacement steps. These primary amines are denoted as NH<sub>2</sub>-R<sub>1</sub>, NH<sub>2</sub>-R<sub>2</sub>, and NH<sub>2</sub>-R<sub>3</sub>; and the entire selection of substituting groups R<sub>1</sub>, R<sub>2</sub>, and R<sub>3</sub> is presented in Scheme S-2. All library members were synthesized with an azide functional group. This allows for site-specific conjugation onto alkyne functionalized

agarose slides by a copper(I) catalyzed 1,3 dipolar cycloaddition reaction.(4-8) This selection of amines is based on their structural similarities to known RNA binders, as described in the manuscript. 3-Azidopropylamine was synthesized as reported in literature.(9) The newly synthesized peptoid library well as a previously reported peptoid library (10) were studied.

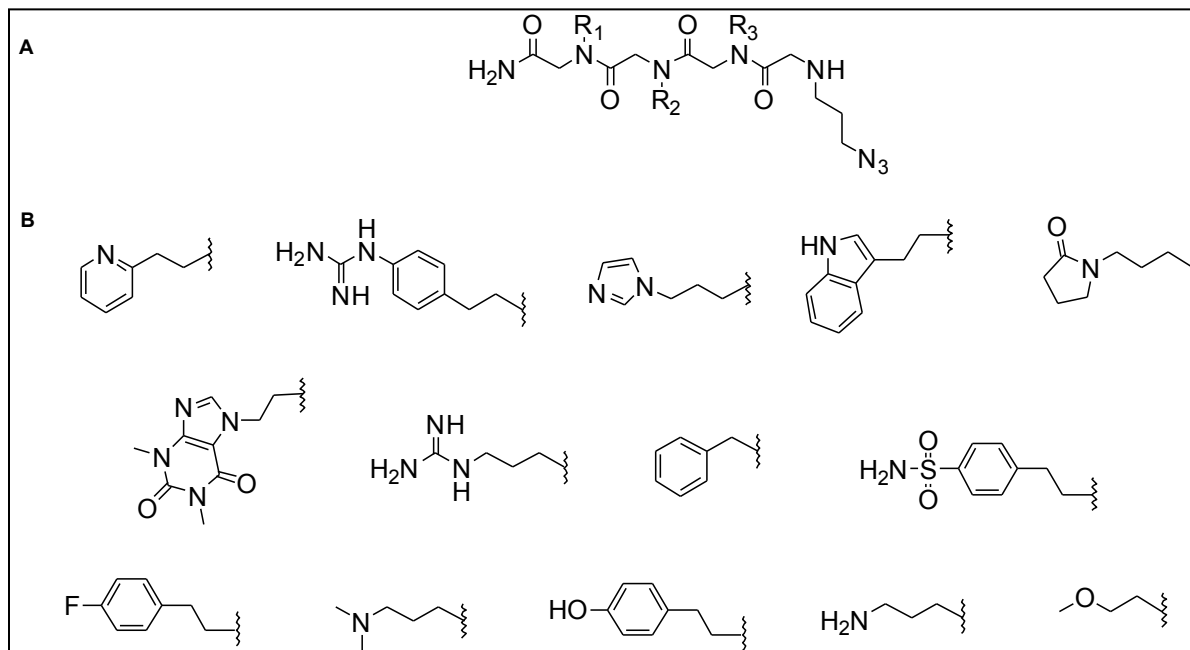

**Scheme S-3.** (A) General structure of peptoid library members and submonomers used to construct them. (B) General structure of peptoid library members and the submonomers used.

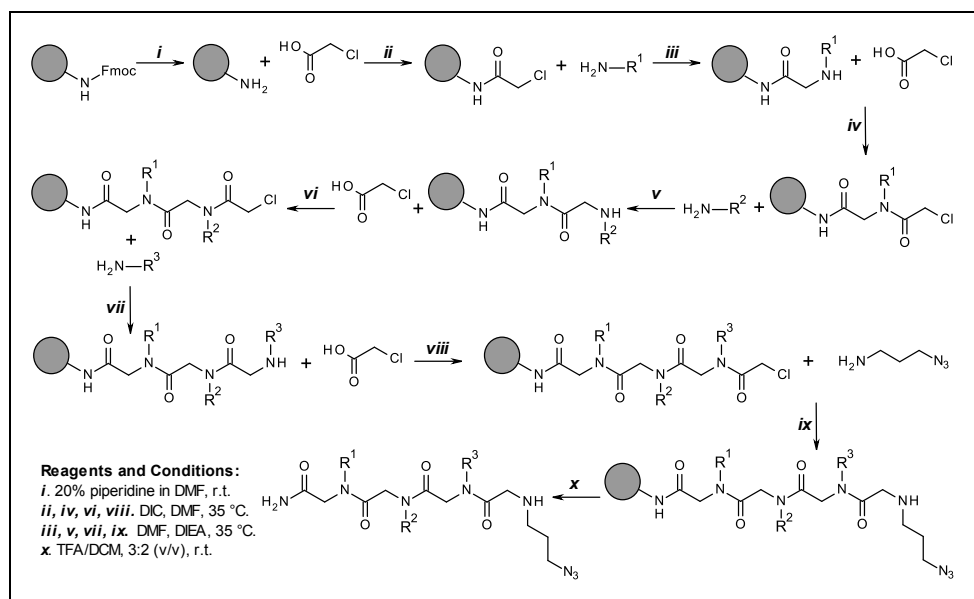

**Scheme S-4:** Solid phase synthetic protocol for peptoids.

**Step i: Deprotection.** Fmoc-Rink Amide MBHA Resin (62.5 mg, 25  $\mu$ mol) with a substitution level of 0.40 meq/g was deprotected using 2 $\times$ 3 mL of 20% piperidine in DMF for 2 $\times$ 20 min with shaking at 550 rpm. The reaction wells were drained by flushing with nitrogen, and the resin was washed with 5 $\times$ 3 mL DMF for 5 $\times$ 2 min while shaking at 550 rpm.

**Steps ii, iv, vi, and viii: Coupling with Chloroacetic acid.** Coupling reactions were completed by adding 0.5 M chloroacetic acid in NMP (2 mL, 1 mmol, 40 equiv.) and 1 M DIC in NMP (1 mL, 1 mmol, 40 equiv.) into reaction wells containing resin-bound amines. Reaction mixtures were shaken at 550 rpm for 30 min at 35 °C. The reagents were then drained, and the coupling step was repeated. The resin was washed with 4 $\times$ 3 mL DMF for 4 $\times$ 2 min, while shaking at 550 rpm.

**Steps iii, v, vii, and ix: Displacement with Primary Amines.** Solutions of primary amines (0.5 M, 2 mL, 1 mmol, 40 equiv.) in NMP and 0.5 M solution of DIPEA in NMP (1 mL, 0.5 mmol, 20 equiv.) were added into the reaction wells. The reaction mixtures were shaken at 550 rpm for 30 min at 35 °C. After draining of the reagents, the displacement was repeated. The reaction wells were drained, and the resin was washed with 4 $\times$ 3 mL DMF for 4 $\times$ 2 min, while shaking at 550 rpm.

**Final Wash:** After completion of the last displacement step, the reaction wells were drained, and the resin was washed with 5×3 mL DMF for 5×2 min while shaking at 550 rpm. The resin was washed again with 4×3 mL methanol for 4×2 min.

**Step x: Cleavage from the Resin.** The resin with bound peptoids was shaken in 2 mL of THF/DCM/H<sub>2</sub>O (59:49:2, v/v/v) for 1 h. The supernatant containing cleaved peptoids was drained and collected. The resin was additionally washed with DCM (3 × 1mL). The volumes of combined cleavage solutions and DCM washes were reduced under stream of nitrogen. The oily residues were resuspended in water, and lyophilized to afford crude peptoids. The crude peptoids were dissolved in the minimal volume of methanol/water mixture (50:50, v/v). The solutions were centrifuged to remove insoluble solids, and supernatant solutions were subject to HPLC purifications using a 5% to 95% gradient of solvent B (0.1% TFA in methanol) in solvent A (0.1% TFA in water) over 35min. LC fractions were analyzed using ESI-MS, and samples containing target products were combined and lyophilized. If additional purification of peptoids was necessary, the products were, resuspended in minimal volume of methanol-water (50:50, v/v) mixture, and samples were HPLC-purified using a 50% to 90% gradient of solvent B (0.1% TFA in methanol) in solvent A (0.1% TFA in water) over 40 min.

In total, 35 peptoids were successfully synthesized. Every compound from this peptoid library passed a mass spectral quality control (QC) analysis where the major peak [M+H]<sup>+</sup> corresponded to a 100% relative intensity compared to other by-product peaks, of which none demonstrated an intensity greater than 25% of the maximal intensity. Purity of the peptoids was estimated by HPLC using integration of the absorbance intensities at 254 nm. Average purity was greater than 60%.

### **I (c) General Protocol for Peptide Synthesis**

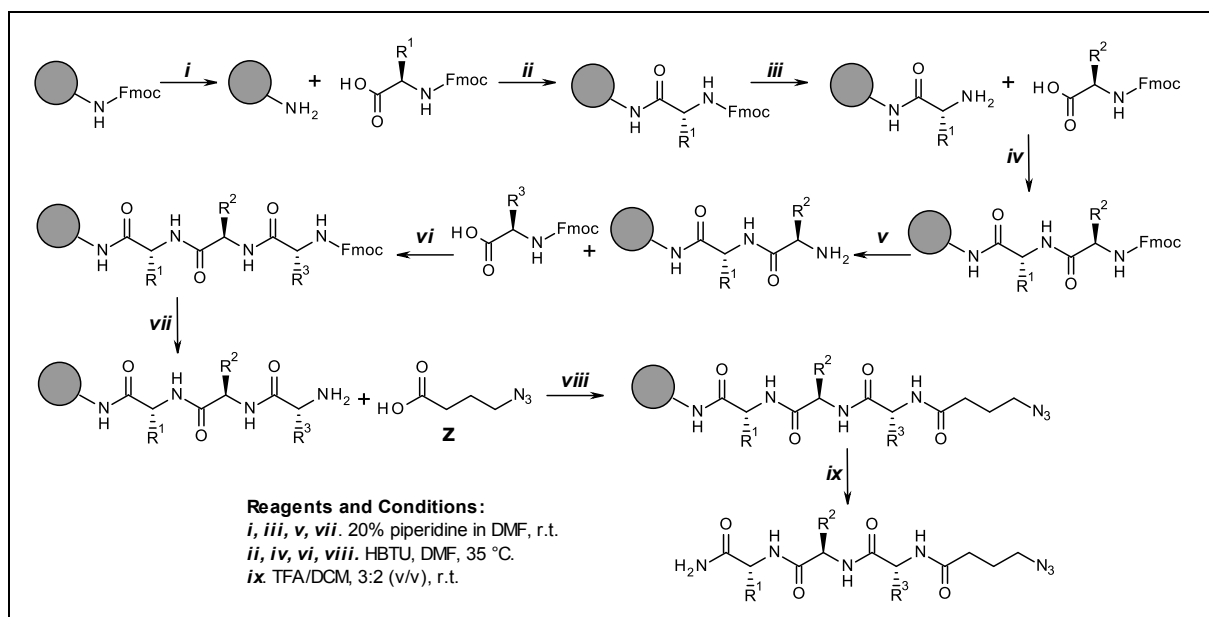

**Scheme S-5:** Solid phase synthetic protocol for peptide library

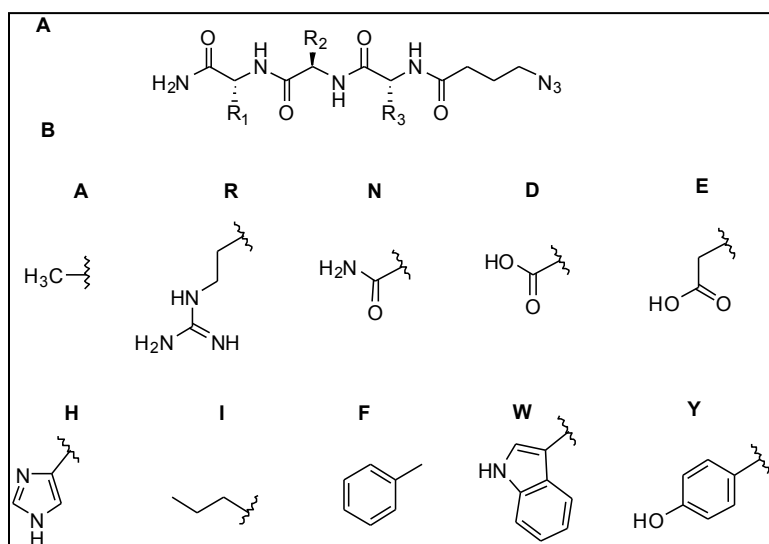

**Scheme S-6.** (A) General structure of peptide library members and submonomers used to construct them. (B) General structure of peptide library members and the submonomers used.

The general scheme for solid-phase peptide synthesis utilized in this work is presented in Scheme S-5. The designed peptides contain three amino acid residues comprised by variations of 10 amino acids as in Scheme S-6, and the *N*-terminus of tripeptides is capped with 4-azidobutyrate. The starting material, 4-azidobutyric acid **Z** (Scheme S-5), was synthesized from commercially available ethyl 4-bromobutyrate in two steps according to previously published

procedures.<sup>(11, 12)</sup> The sequences of 74 synthesized tripeptides were chosen from the list of sequences obtained using a Random Number Generator. All library members were synthesized with an azide functional group. This allows for site-specific conjugation onto alkyne functionalized agarose slides by a copper(I) catalyzed 1,3 dipolar cycloaddition reaction.<sup>(4-8)</sup>

**Step i: Deprotection.** Fmoc-Rink Amide MBHA Resin (62.5 mg, 25  $\mu$ mol) with a substitution level of 0.40 meq/g was deprotected using 2 $\times$ 3 mL of 20% piperidine in DMF for 2 $\times$ 20 min with shaking at 550 rpm (Figure 13). The reaction wells were drained by flushing with nitrogen, and the resin was washed with 5 $\times$ 3 mL DMF for 5 $\times$ 2 min while shaking at 550 rpm.

**Steps ii, iv, vi, and viii: Coupling with Fmoc-protected amino acids and 4-azidobutyric acid.** Coupling reactions were completed by adding 0.5 M solutions of Fmoc-protected amino acids, or 4-azidobutyric acid in NMP (2 mL, 1 mmol, 40 equiv.) and 0.5 M HBTU in NMP (2 mL, 1 mmol, 40 equiv.) into reaction wells containing growing peptides on the resin. Reaction mixtures were shaken at 550 rpm for 30 min at 35  $^{\circ}$ C. The reagents were then drained, and the coupling step was repeated. The resin was washed with 4 $\times$ 3 mL DMF for 4 $\times$ 2 min, while shaking at 550 rpm.

**Steps iii, v, and vii: Deprotection of N-terminus of peptides.** Piperidine (20% in DMF) was added to the reaction wells containing growing peptides on the resin. Reaction mixtures were shaken at 550 rpm for 20 min, the wells were drained, and deprotection procedure was repeated. The reaction wells were finally drained by flushing with nitrogen, and the resin was washed with 5 $\times$ 3 mL DMF for 5 $\times$ 2 min while shaking at 550 rpm.

**Final Wash:** After completion of the last coupling step with 4-azidobutyric acid **z**, the reaction wells were drained, and the resin was washed with 5 $\times$ 3 mL DMF for 5 $\times$ 2 min while shaking at 550 rpm. The resin was washed again with 4 $\times$ 3 mL methanol for 4 $\times$ 2 min.



**Step ix: Cleavage from the Resin.** The resin with bound peptides was shaken in 2 mL of TFA/DCM/H<sub>2</sub>O (59:49:2, v/v/v) for 1 h. The supernatant containing cleaved peptides was drained and collected. The resin was additionally washed with DCM (3×1 mL). The volumes of combined cleavage solutions and DCM washes were reduced under stream of nitrogen. The oily residues were resuspended in water, and lyophilized to afford crude peptides. The crude peptides were dissolved in the minimal volume of methanol/water mixtures. The solutions were centrifuged to remove insoluble solids, and supernatant solutions were subject to HPLC purifications using a 0% to 100% gradient of solvent B (0.1% TFA in methanol) in solvent A (0.1% TFA in water) over 50min. LC fractions were analyzed using ESI-MS, and samples containing target products were combined and lyophilized.

## Section II: Spectroscopic Data for Compounds

### II (a) Mass Spectral Data for 2-Aminobenzimidazole Library Members

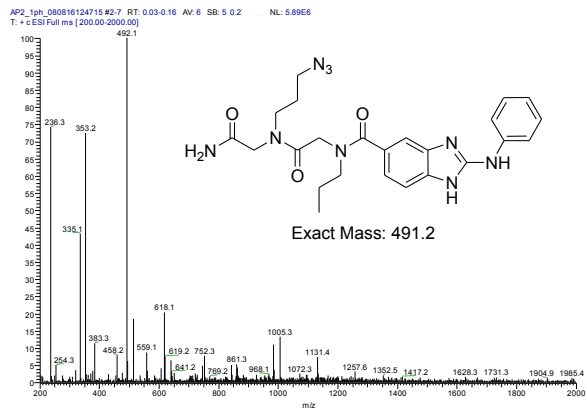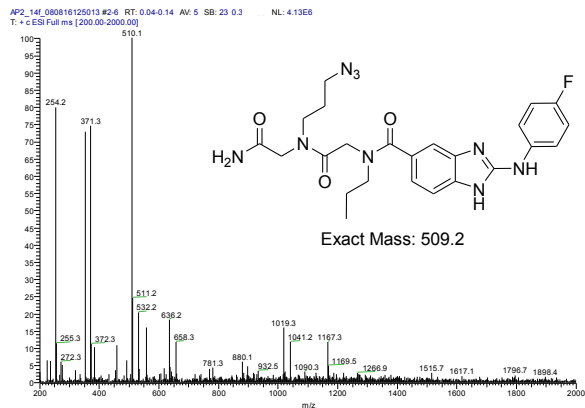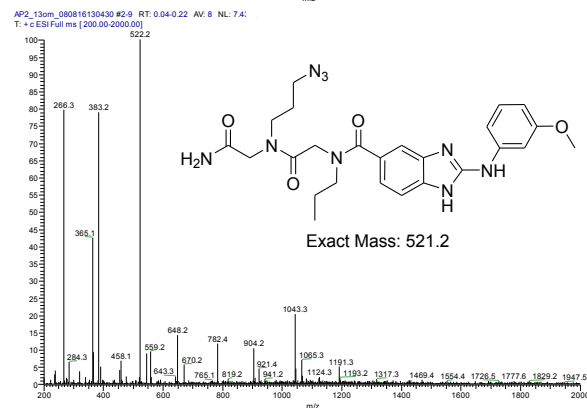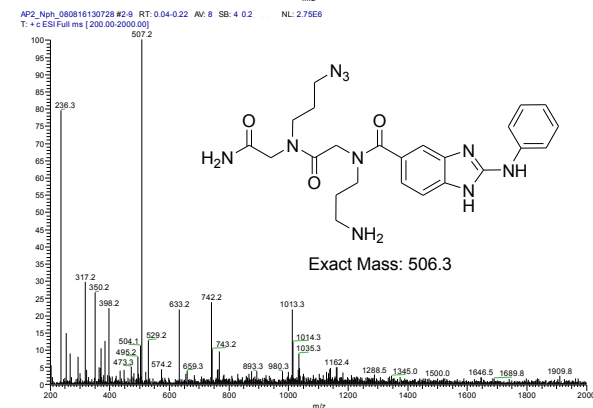

AP2\_N41\_080816131020 #3-8 RT: 0.07-0.20 Av: 6 NL: 2.28E  
T: + c ESI Full ms [200.00-2000.00]

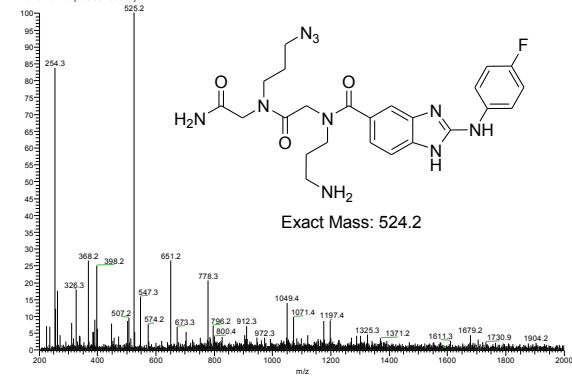

AP2\_N31\_080816131556 #3-8 RT: 0.07-0.20 Av: 6 SB: 2.00 NL: 2.12E6  
T: + c ESI Full ms [200.00-2000.00]

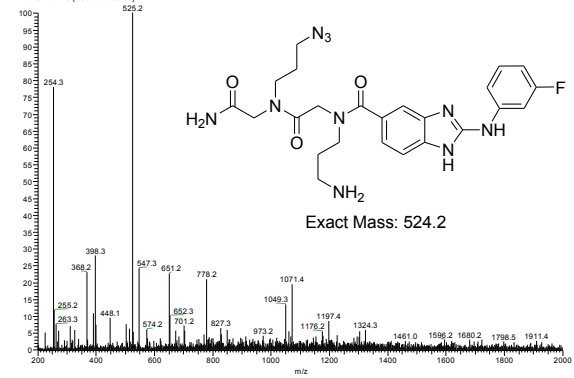

AP2\_N35ct\_080816131653 #4-7 RT: 0.10-0.17 Av: 4 NL: 4.1  
T: + c ESI Full ms [200.00-2000.00]

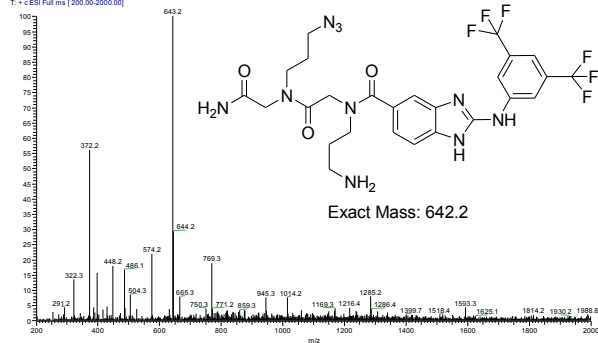

AP2\_N40m\_080816132004 #5-7 RT: 0.12-0.17 Av: 3 NL: 2.4  
T: + c ESI Full ms [200.00-2000.00]

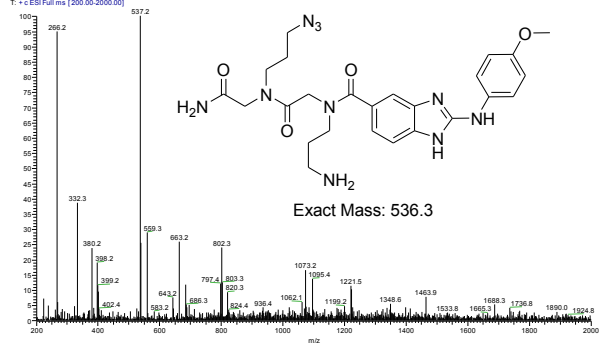

AP2\_N30m\_080816132348 #2-8 RT: 0.03-0.19 Av: 7 NL: 4.8  
T: + c ESI Full ms [200.00-2000.00]

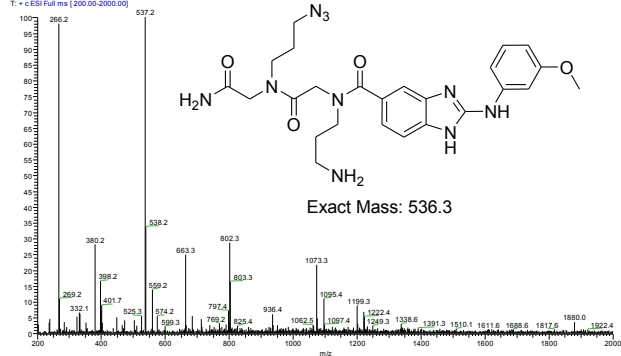

AP2\_B1ph\_080816132716 #3-8 RT: 0.07-0.19 Av: 6 NL: 7.26E  
T: + c ESI Full ms [200.00-2000.00]

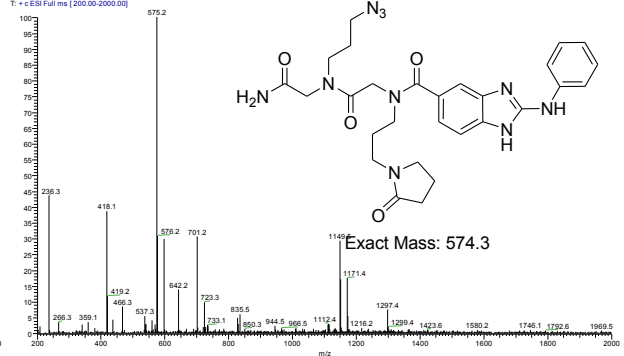

AP2\_B41\_080816133018 #4-9 RT: 0.09-0.21 Av: 6 NL: 8.12E  
T: + c ESI Full ms [200.00-2000.00]

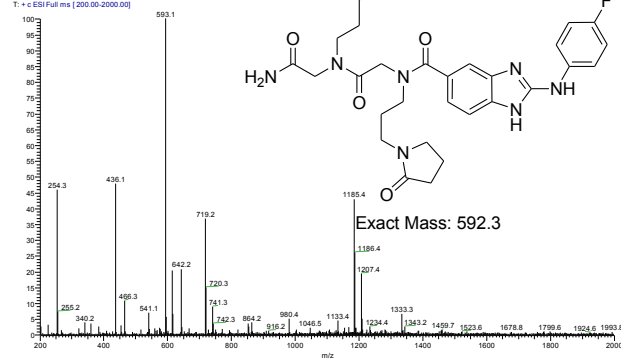

AP2\_B3f\_080816133339 #2-8 RT: 0.04-0.20 Av: 7 NL: 7.12E  
T: + c ESI Full ms [200.00-2000.00]

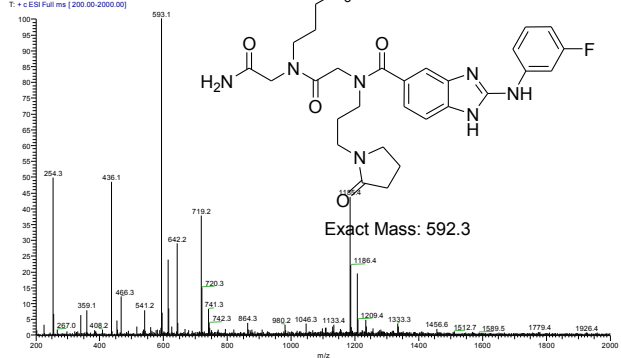

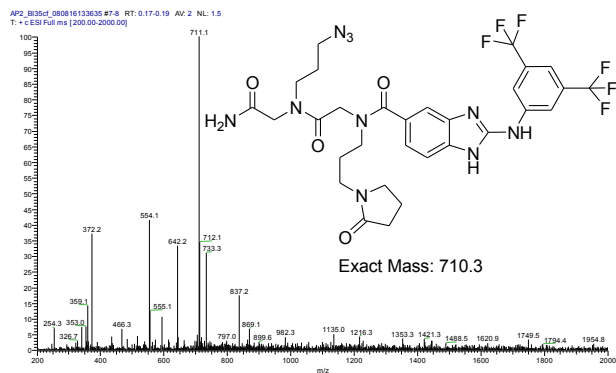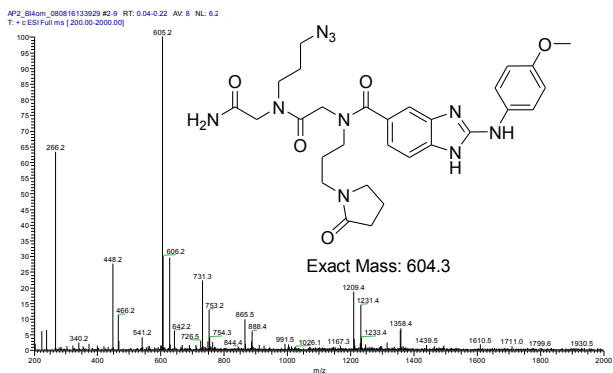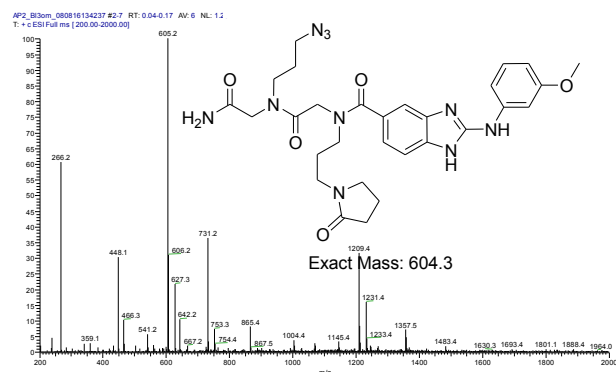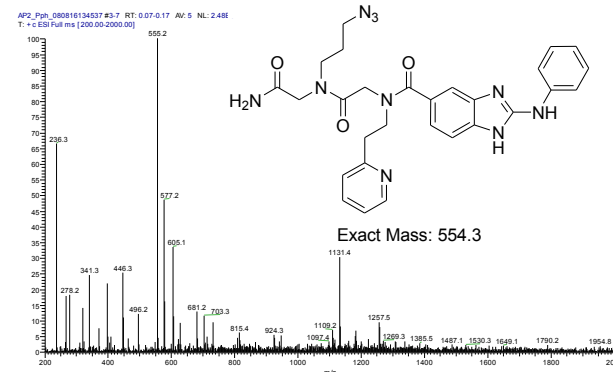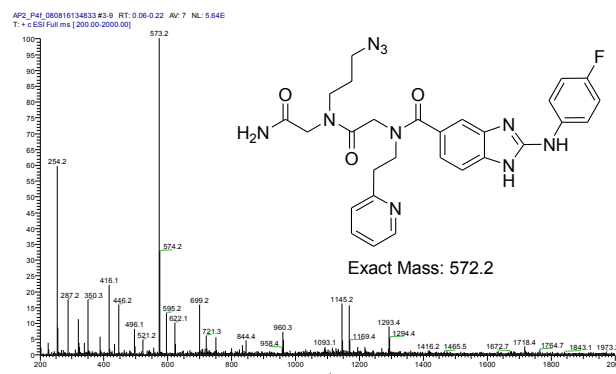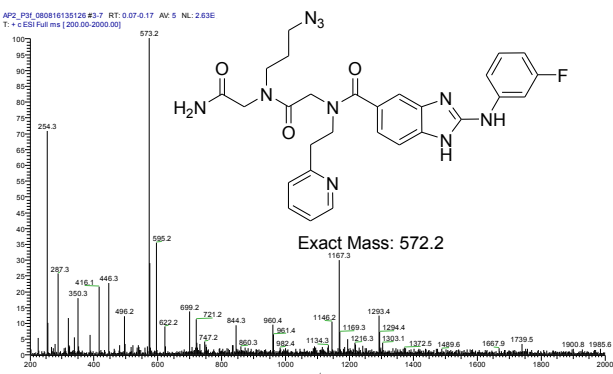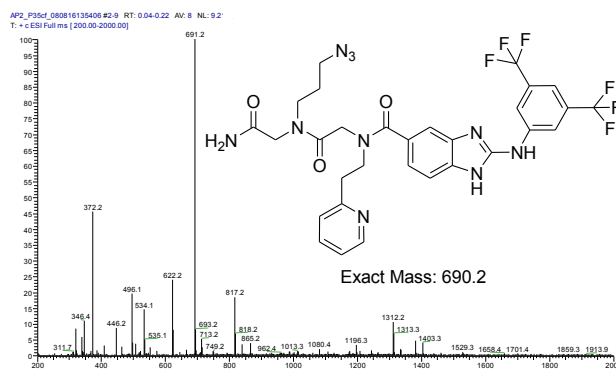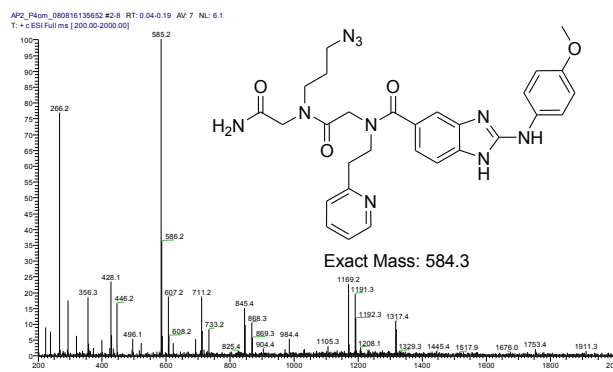

AP2\_P3om\_080816135937 #3.7 RT: 0.07-0.17 Av: 5 NL: 7.9  
T: + c ESI Full ms [200.00-2000.00]

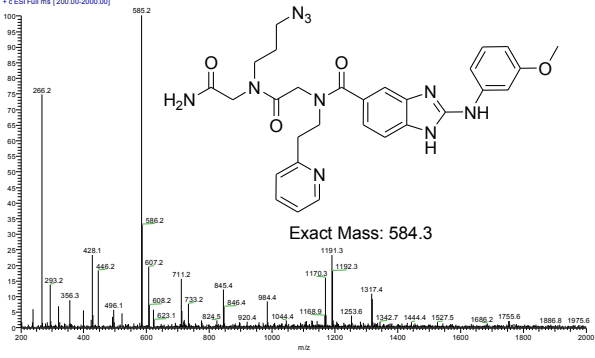

AP2\_Ih\_080816140221 #2.7 RT: 0.03-0.17 Av: 6 NL: 3.96E1  
T: + c ESI Full ms [200.00-2000.00]

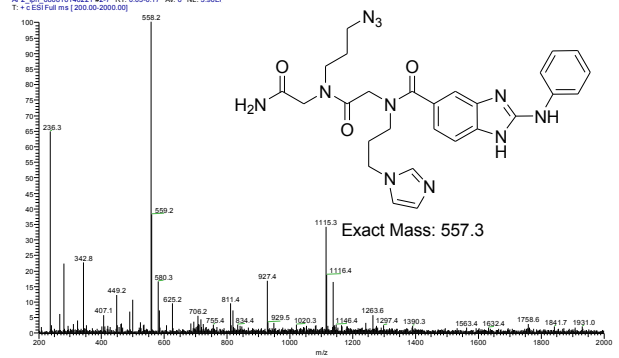

AP2\_HF\_080816140512 #3.7 RT: 0.07-0.17 Av: 5 NL: 5.30E6  
T: + c ESI Full ms [200.00-2000.00]

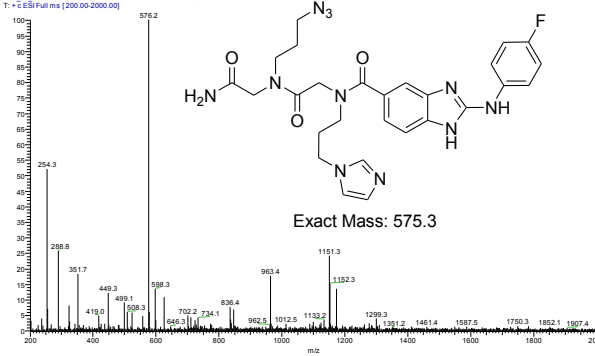

AP2\_IH\_080816140767 #2.8 RT: 0.04-0.20 Av: 7 NL: 2.44E6  
T: + c ESI Full ms [200.00-2000.00]

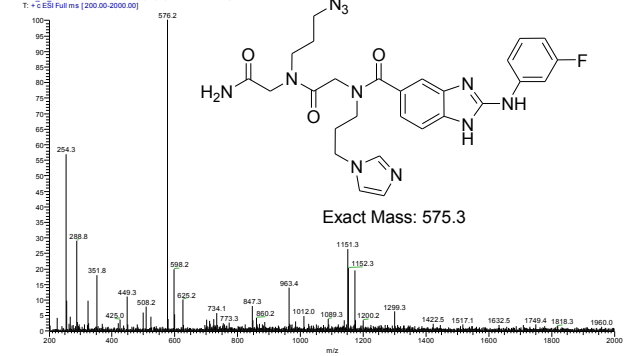

AP2\_I3cd\_080816141043 #2.8 RT: 0.04-0.20 Av: 7 NL: 6.16  
T: + c ESI Full ms [200.00-2000.00]

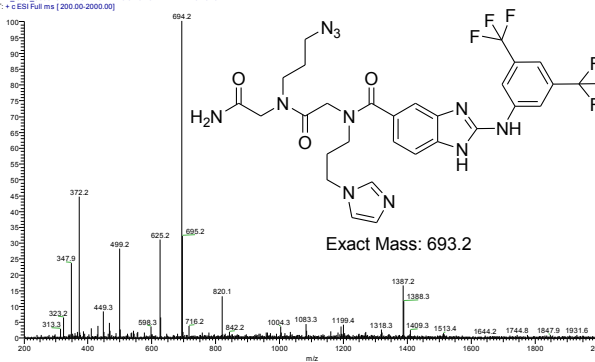

AP2\_I3om\_080816141337 #3.8 RT: 0.07-0.19 Av: 6 NL: 6.64  
T: + c ESI Full ms [200.00-2000.00]

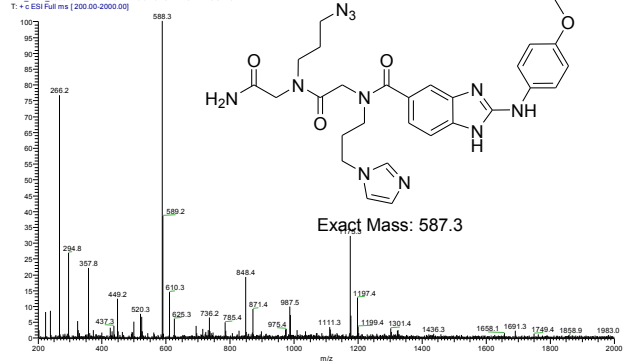

AP2\_I3om\_080816141621 #4.8 RT: 0.09-0.20 Av: 5 NL: 5.95  
T: + c ESI Full ms [200.00-2000.00]

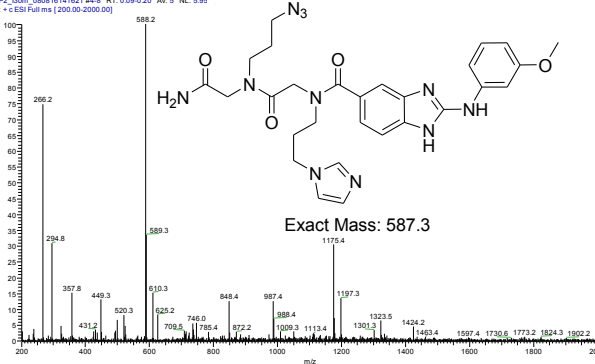

AP2\_I3oh #3.9 RT: 0.07-0.22 Av: 7 NL: 7.60E6  
T: + c ESI Full ms [200.00-2000.00]

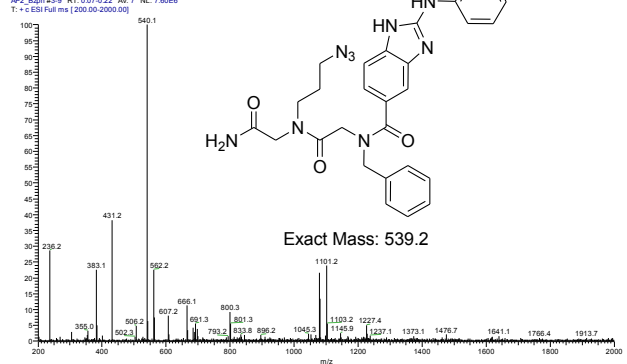

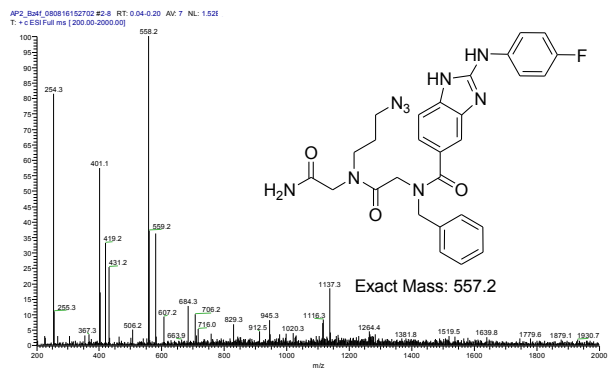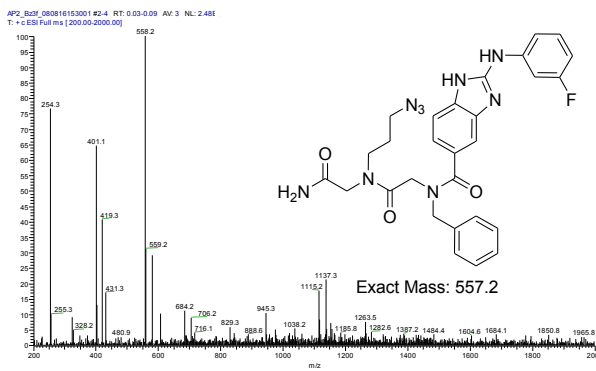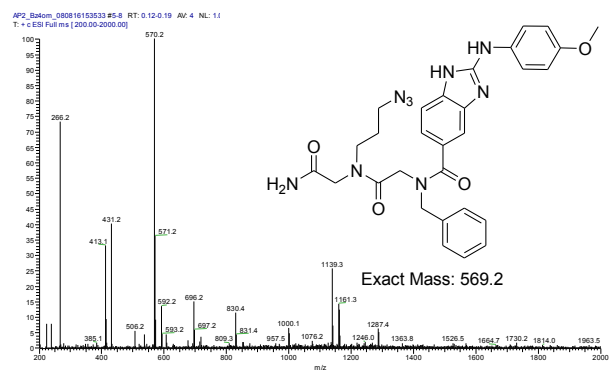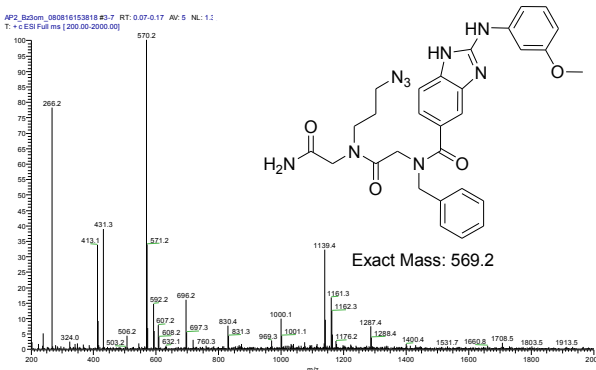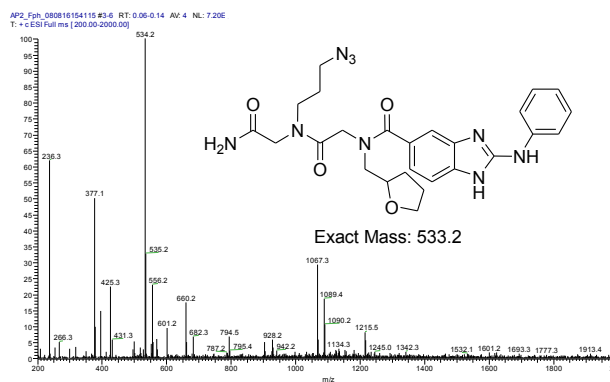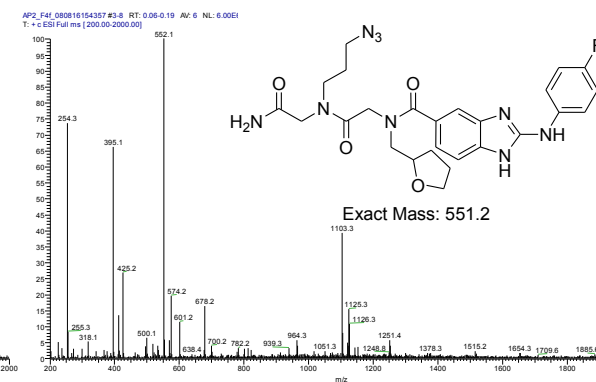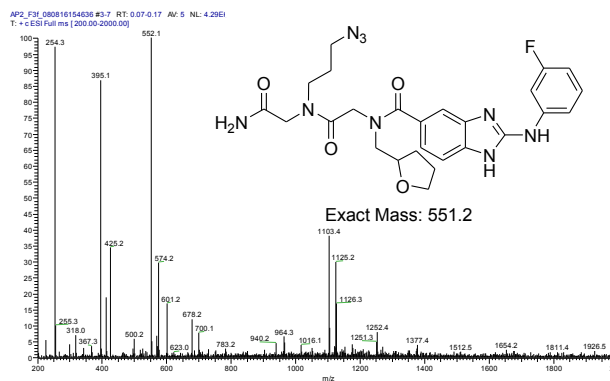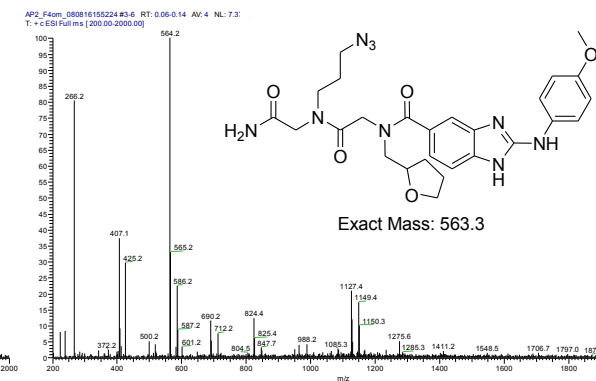

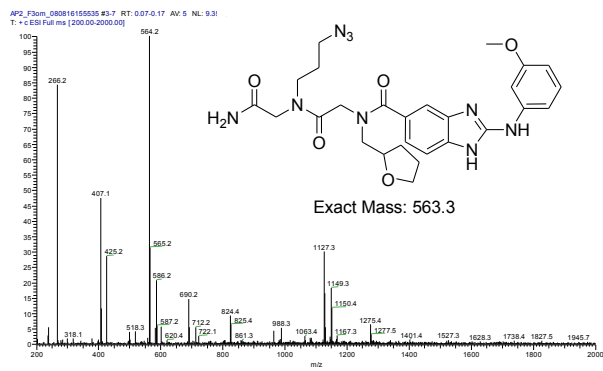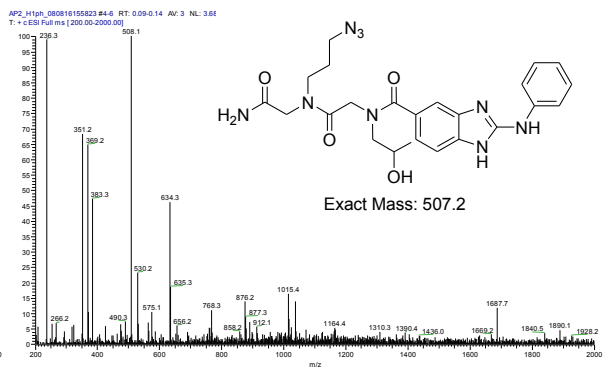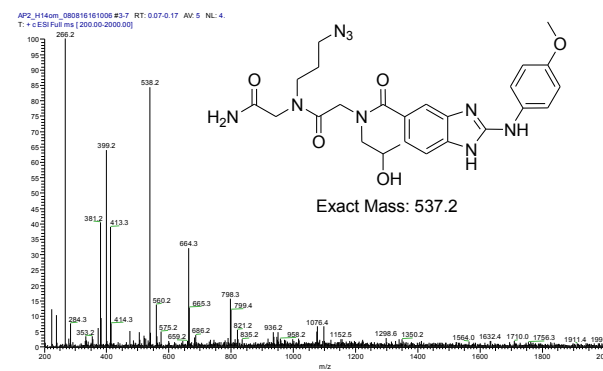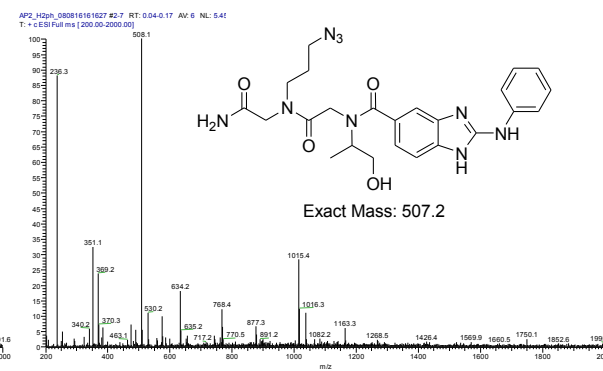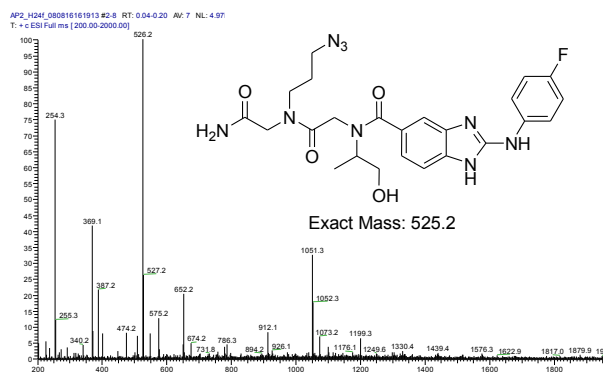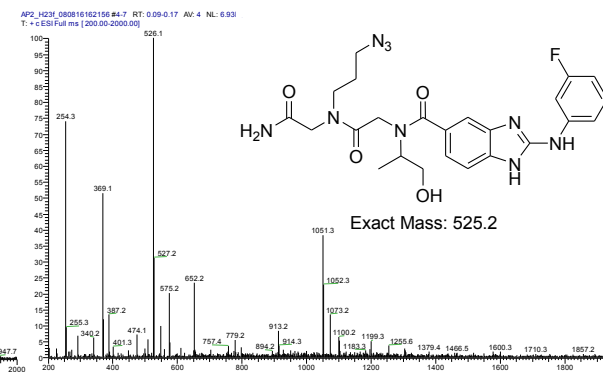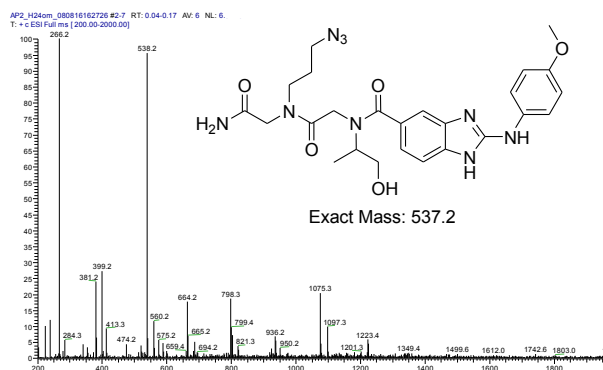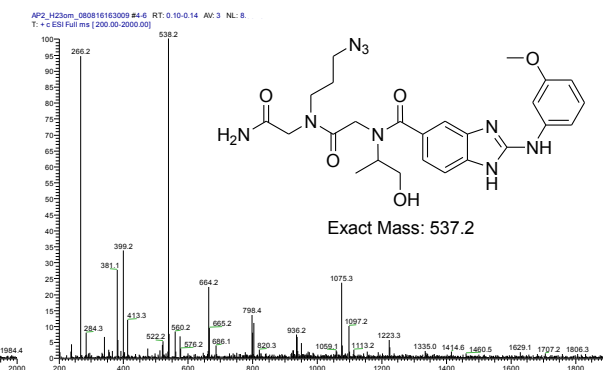

AP2\_P44f\_080816163252 #3.5 RT: 0.07-0.13 Av: 3 NL: 6.09L  
T: + c ESI Full ms [200.00-2000.00]

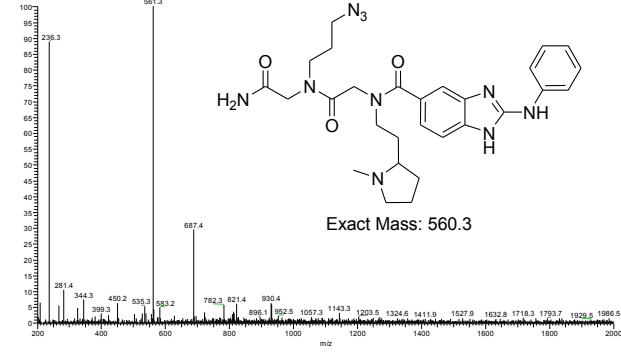

AP2\_P44f\_080816163536 #2.8 RT: 0.03-0.20 Av: 7 NL: 3.05f  
T: + c ESI Full ms [200.00-2000.00]

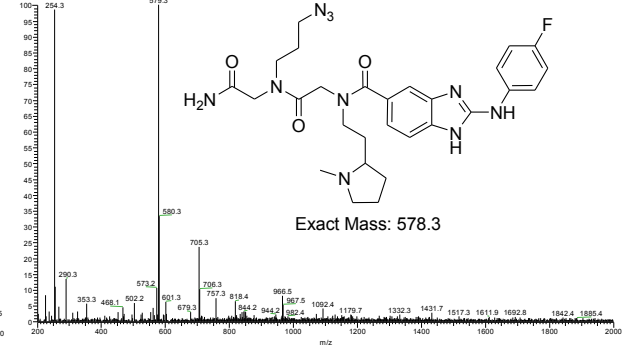

AP2\_P435f\_080816163819 #3.8 RT: 0.07-0.20 Av: 6 NL: 3.11f  
T: + c ESI Full ms [200.00-2000.00]

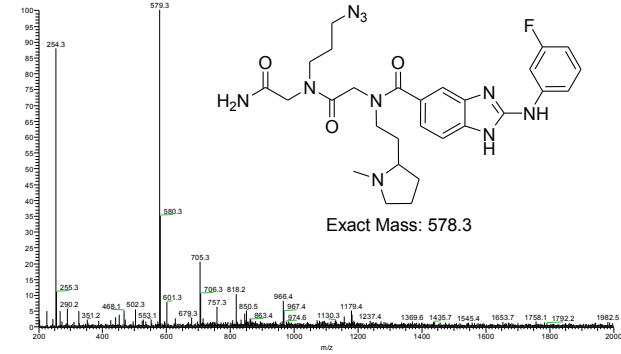

AP2\_P435f\_080816164111 #2.7 RT: 0.04-0.17 Av: 6 NL: 3.1  
T: + c ESI Full ms [200.00-2000.00]

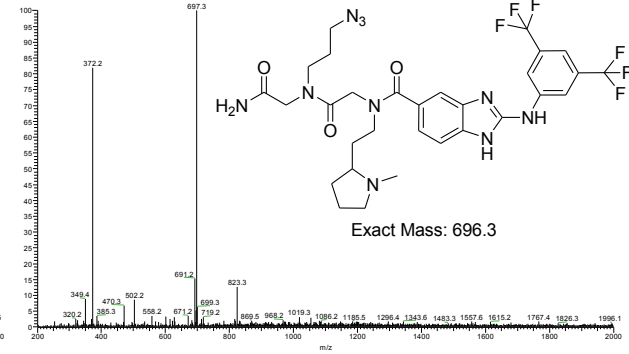

AP2\_P44om\_080816164356 #3.7 RT: 0.07-0.17 Av: 5 NL: 6  
T: + c ESI Full ms [200.00-2000.00]

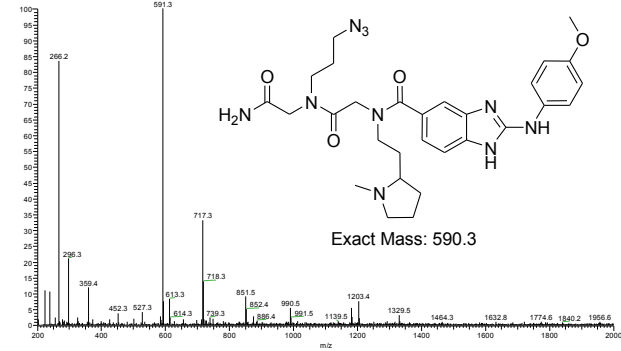

AP2\_P43om\_080816164642 #2.9 RT: 0.04-0.23 Av: 8 NL: 3  
T: + c ESI Full ms [200.00-2000.00]

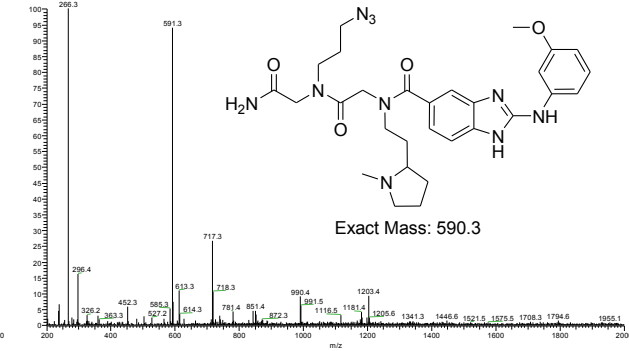

AP2\_M6f\_080816164933 #3.8 RT: 0.07-0.20 Av: 6 NL: 5.19f  
T: + c ESI Full ms [200.00-2000.00]

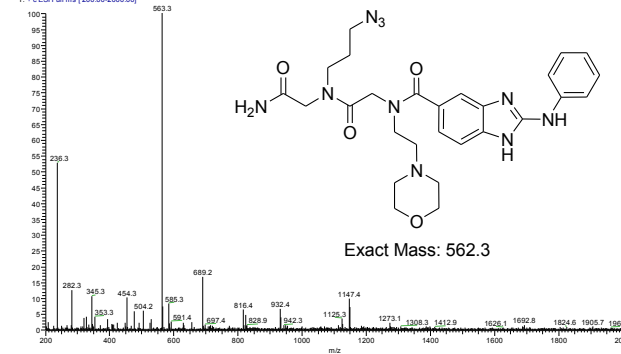

AP2\_M6f\_080816165221 #3.7 RT: 0.03-0.17 Av: 6 NL: 6.46f  
T: + c ESI Full ms [200.00-2000.00]

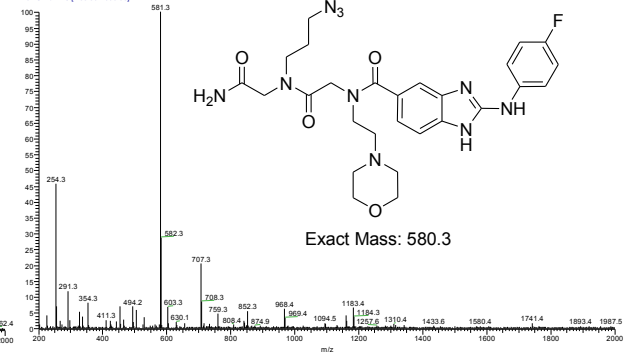



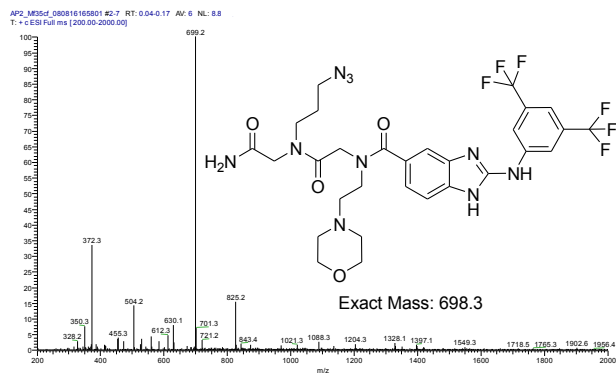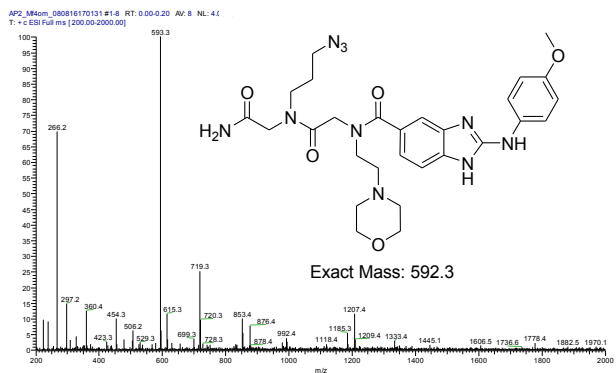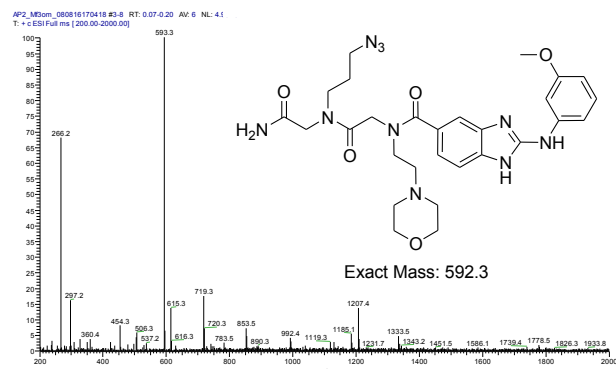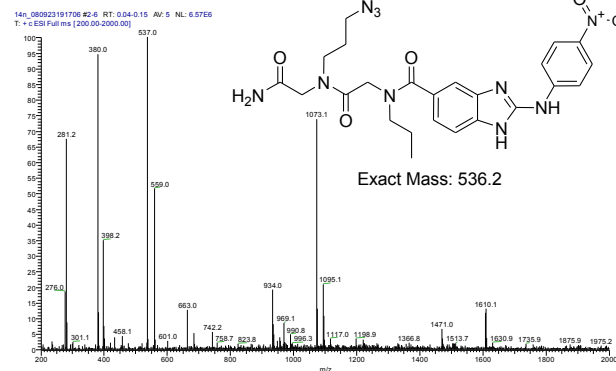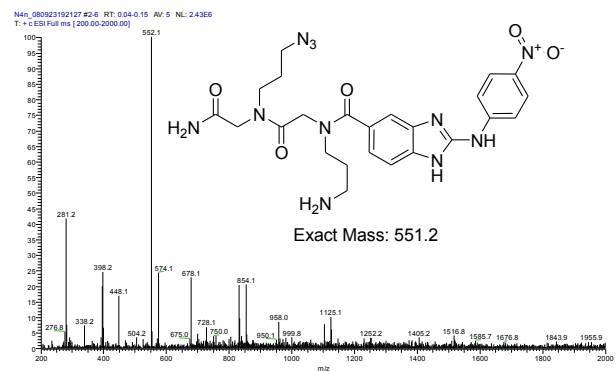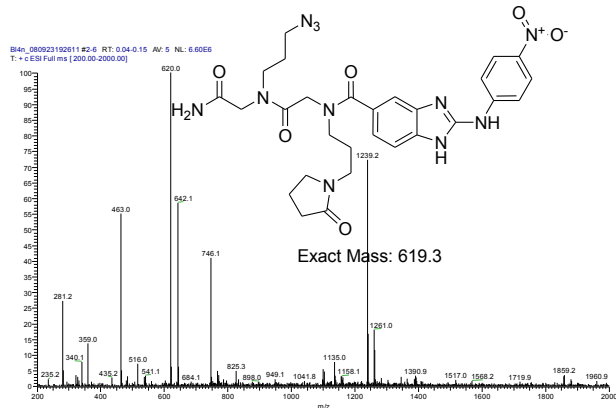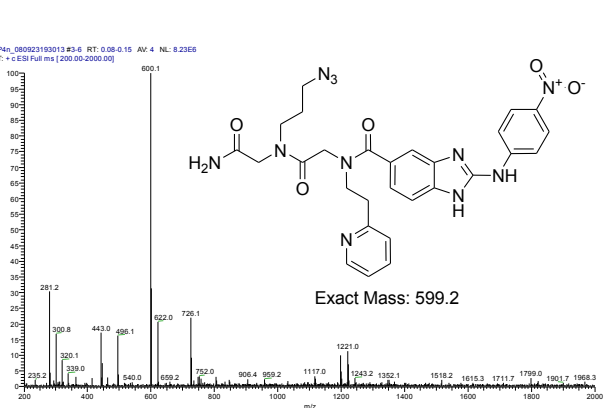

Mn\_080923193416 #2.6 RT: 0.04-0.15 Av: 5 NL: 5.596E  
T: + c ESI Full ms [200.00-2000.00]

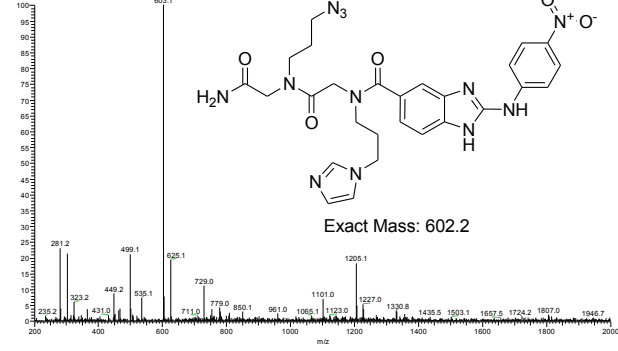

B4a\_080923193815 #2.6 RT: 0.04-0.15 Av: 5 NL: 8.236E  
T: + c ESI Full ms [200.00-2000.00]

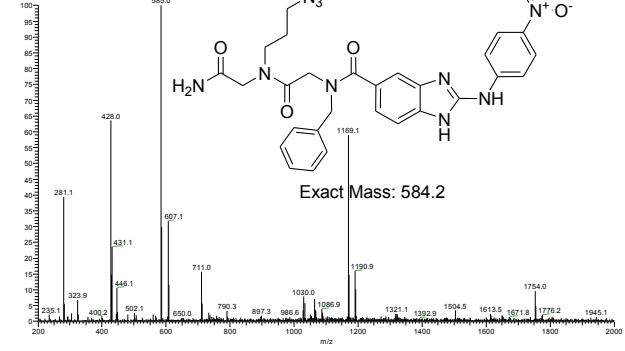

F4i\_080923194056 #2.7 RT: 0.04-0.17 Av: 6 NL: 5.546E  
T: + c ESI Full ms [200.00-2000.00]

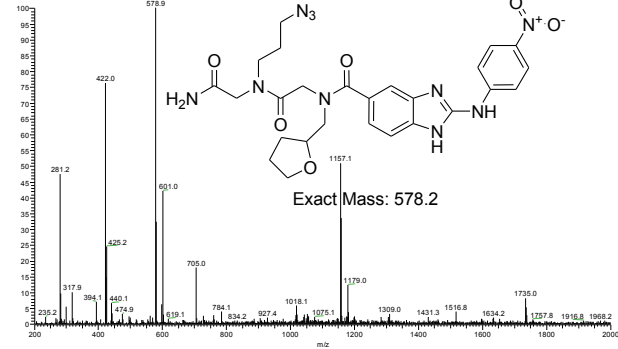

H24i\_080923195744 #3.6 RT: 0.08-0.15 Av: 4 NL: 4.866E  
T: + c ESI Full ms [200.00-2000.00]

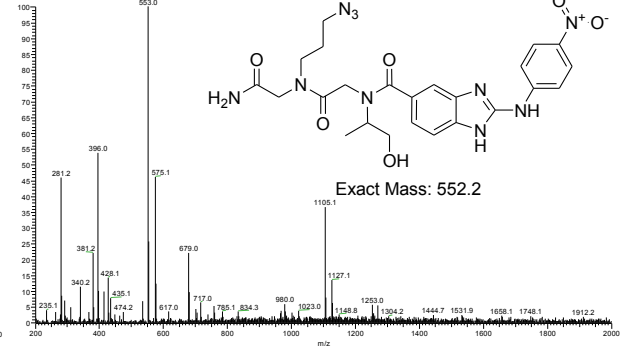

P44i\_080923200148 #3.5 RT: 0.07-0.12 Av: 3 NL: 1.076E  
T: + c ESI Full ms [200.00-2000.00]

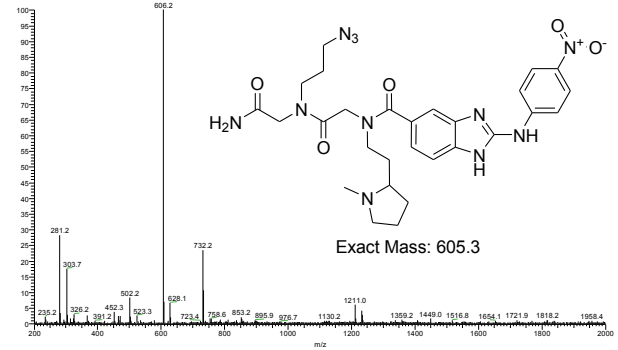

M4i\_080923200551 #2.6 RT: 0.04-0.15 Av: 5 NL: 9.246E  
T: + c ESI Full ms [200.00-2000.00]

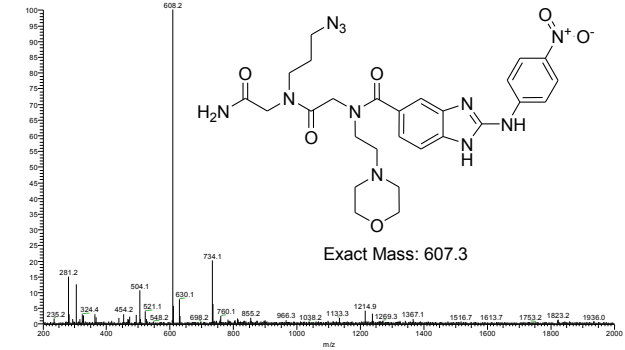

T4i\_080923200905 #2.6 RT: 0.04-0.15 Av: 5 NL: 8.286E  
T: + c ESI Full ms [200.00-2000.00]

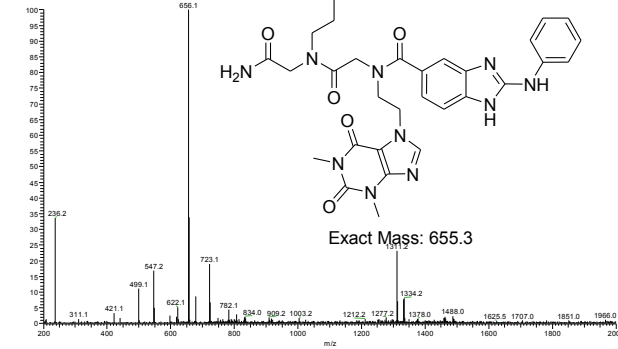

T4i\_080923201356 #3.6 RT: 0.08-0.15 Av: 4 NL: 1.176E  
T: + c ESI Full ms [200.00-2000.00]

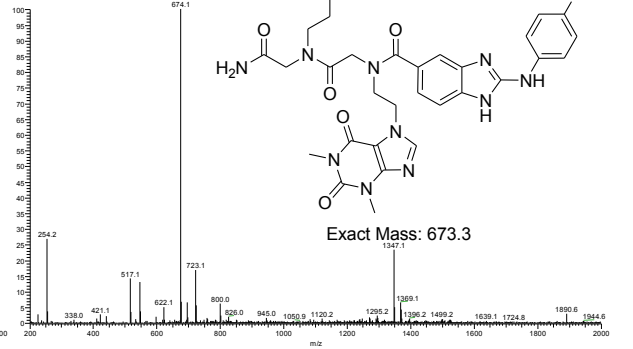

Tp3f\_08092320241 #3-5 RT: 0.08-0.13 Av: 3 NL: 1.32E7  
T: + c ESI Full ms [200.00-2000.00]

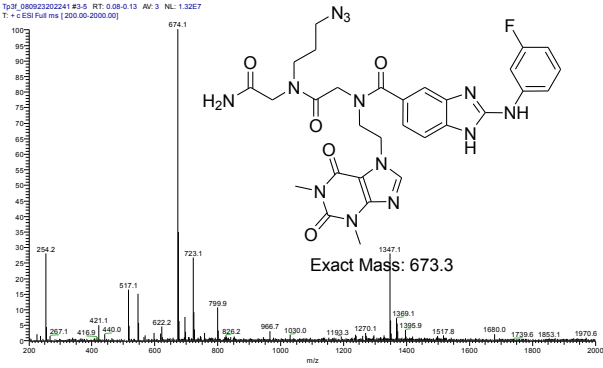

Tp35f\_08092320318 #2-7 RT: 0.04-0.17 Av: 6 NL: 2.10E7  
T: + c ESI Full ms [200.00-2000.00]

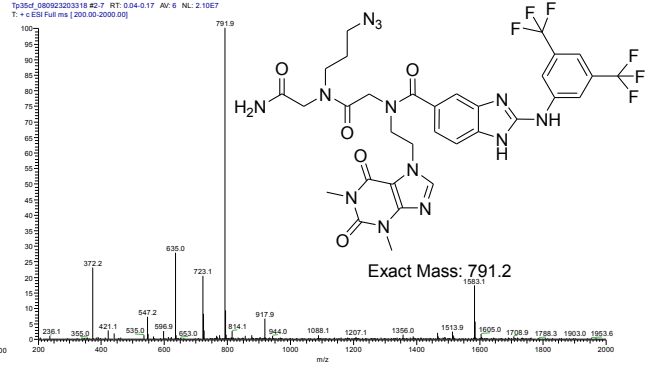

Tp4m\_08092320371 #2-6 RT: 0.04-0.15 Av: 9 NL: 1.15E7  
T: + c ESI Full ms [200.00-2000.00]

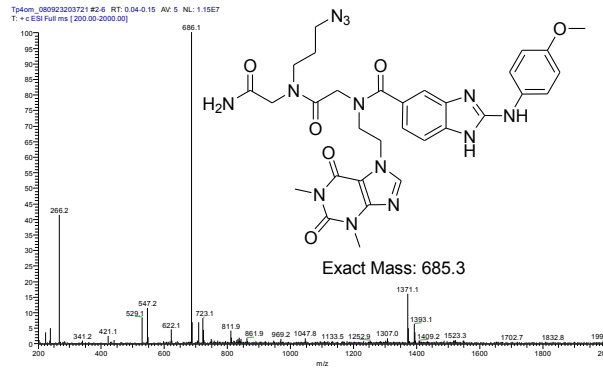

Tp3m\_08092320413 #2-6 RT: 0.04-0.15 Av: 9 NL: 1.24E7  
T: + c ESI Full ms [200.00-2000.00]

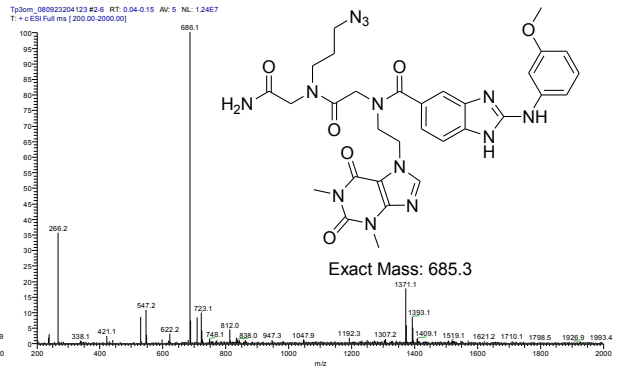

Tp4n\_08092320451 #2-4 RT: 0.04-0.15 Av: 5 NL: 1.05E7  
T: + c ESI Full ms [200.00-2000.00]

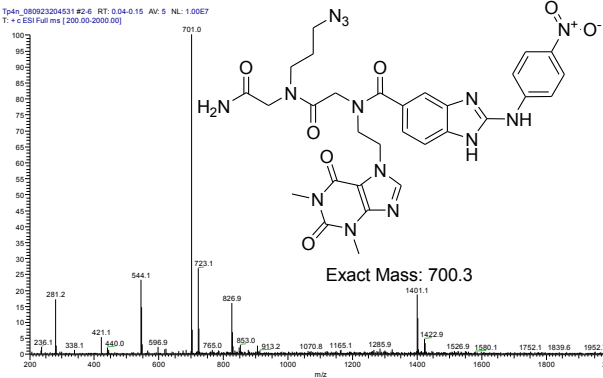

l5nPh\_08092320497 #2-5 RT: 0.04-0.13 Av: 4 NL: 1.83E6  
T: + c ESI Full ms [200.00-2000.00]

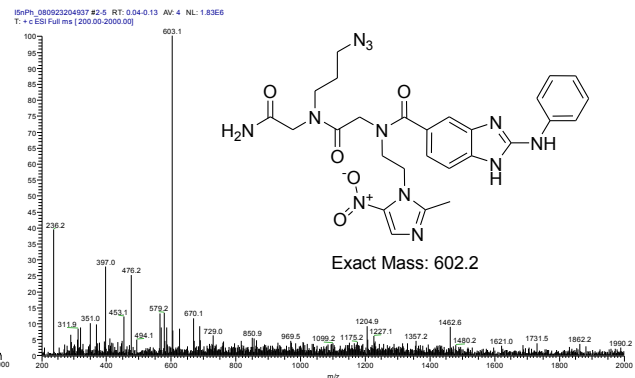

l5n4f\_08092320543 #3-5 RT: 0.08-0.13 Av: 3 NL: 2.06E6  
T: + c ESI Full ms [200.00-2000.00]

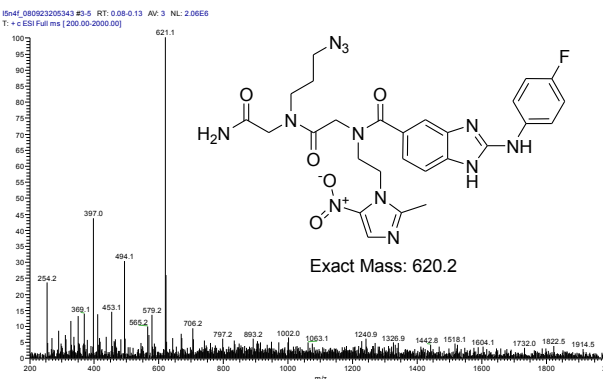

l5n3f\_080923205747 #3-5 RT: 0.07-0.13 Av: 3 NL: 2.37E6  
T: + c ESI Full ms [200.00-2000.00]

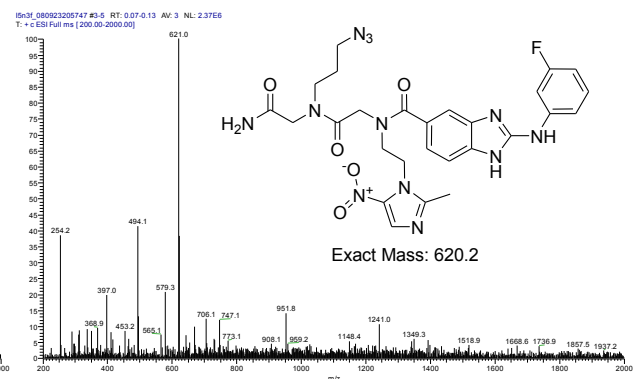



## II (b) Mass Spectral Data for Peptoid Library Members

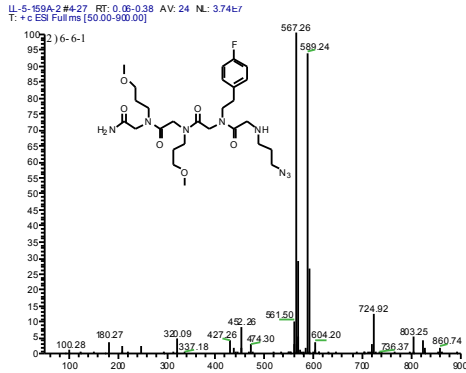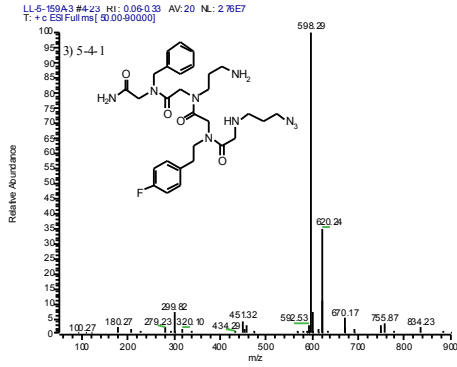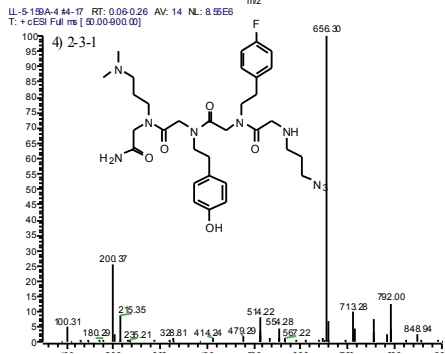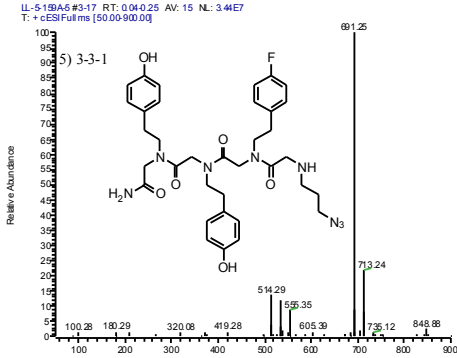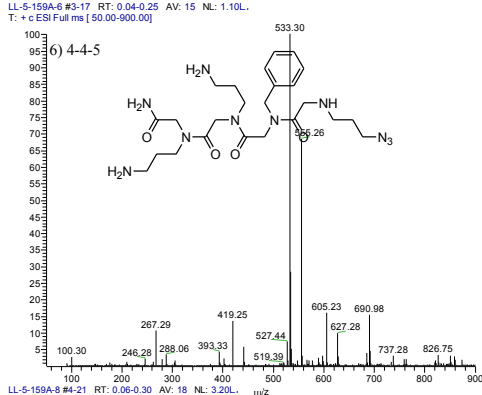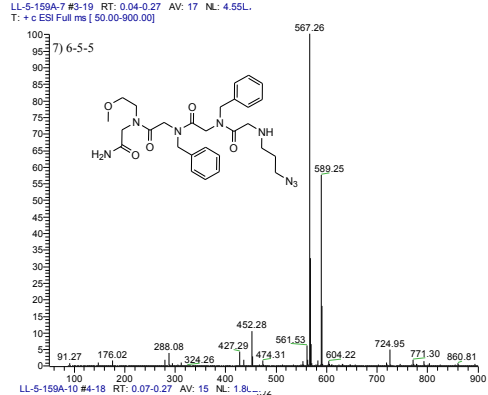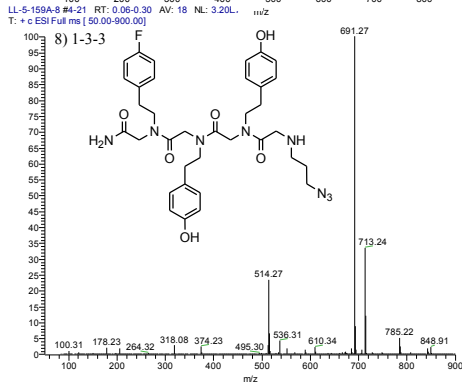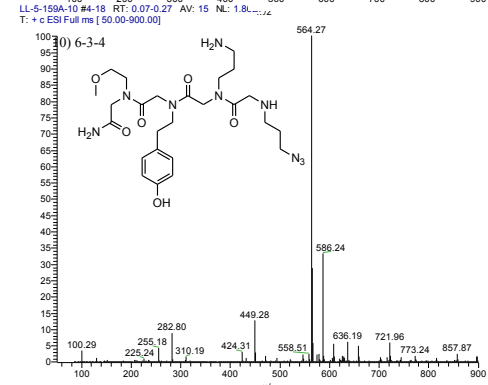

LL-5-159A-16\_090703133520 #5-19 RT: 0.08-0.28 NL: 1.25E7  
T: + c ESI Full ms [ 50.00-900.00]

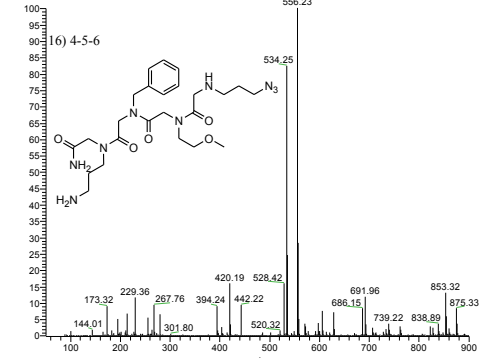

LL-5-159A-18 #3-20 RT: 0.04-0.28 AV: 18 NL: 3.6...  
T: + c ESI Full ms [ 50.00-900.00]

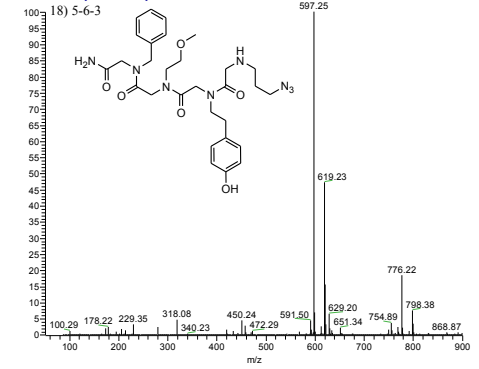

LL-5-159A-17 #3-14 RT: 0.03-0.20 AV: 12 NL: 5.8...  
T: + c ESI Full ms [ 50.00-900.00]

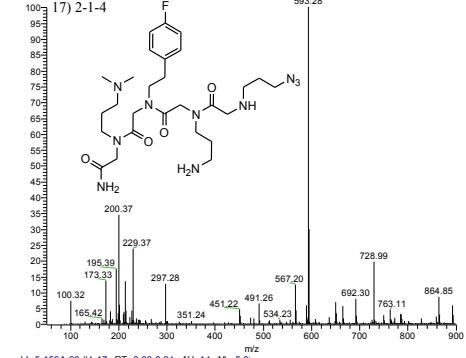

LL-5-159A-20 #4-17 RT: 0.06-0.24 AV: 14 NL: 5.0...  
T: + c ESI Full ms [ 50.00-900.00]

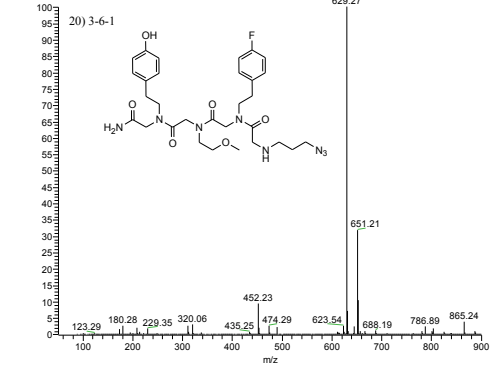

LL-5-159A-11 #5-19 RT: 0.08-0.27 AV: 15 NL: 5.9...  
T: + c ESI Full ms [ 50.00-900.00]

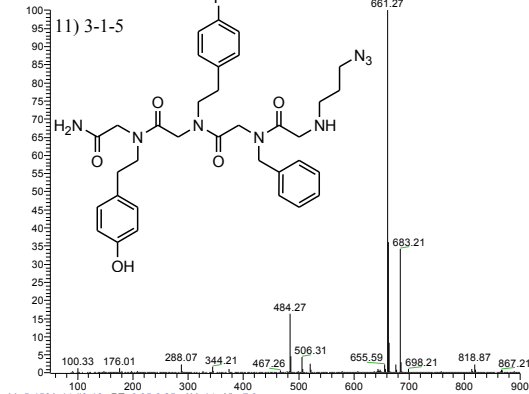

LL-5-159A-13 #3-18 RT: 0.05-0.26 AV: 16 NL: 6.5...  
T: + c ESI Full ms [ 50.00-900.00]

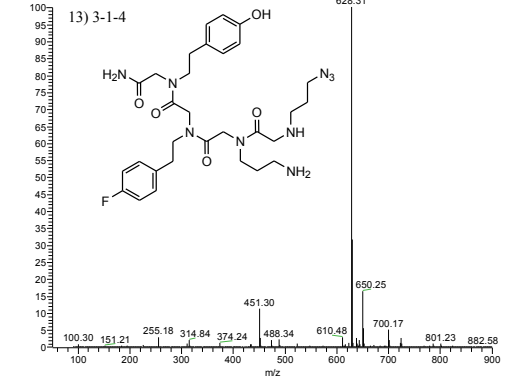

LL-5-159A-14 #3-16 RT: 0.05-0.25 AV: 14 NL: 7.0...  
T: + c ESI Full ms [ 50.00-900.00]

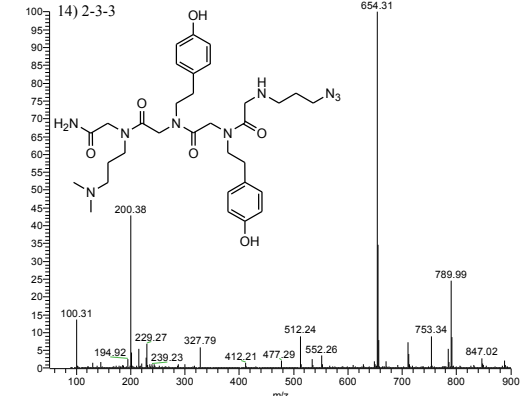

LL-5-159A-15 #4-17 RT: 0.06-0.25 AV: 14 NL: 3.6...  
T: + c ESI Full ms [ 50.00-900.00]

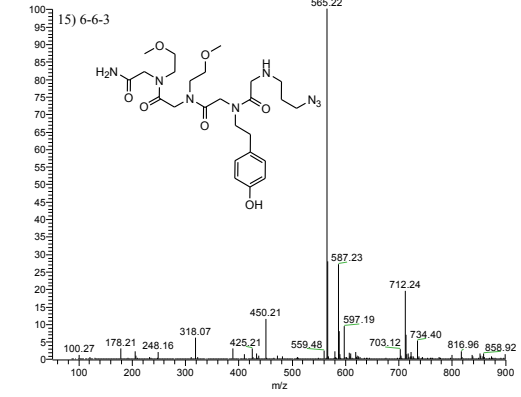

LL-5-159A-22 #4-20 RT: 0.06-0.28 AV: 17 NL: 3.3...  
T: + c ESI Full ms [ 50.00-900.00]

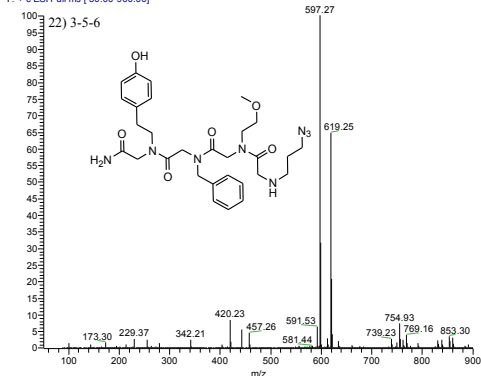

LL-5-159A-23 #5-16 RT: 0.06-0.23 AV: 12 NL: 4.8...  
T: + c ESI Full ms [ 50.00-900.00]

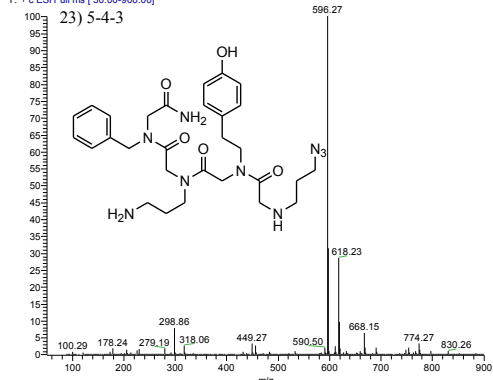

LL-5-159A-24 #4-15 RT: 0.06-0.22 AV: 12 NL: 2.1...  
T: + c ESI Full ms [ 50.00-900.00]

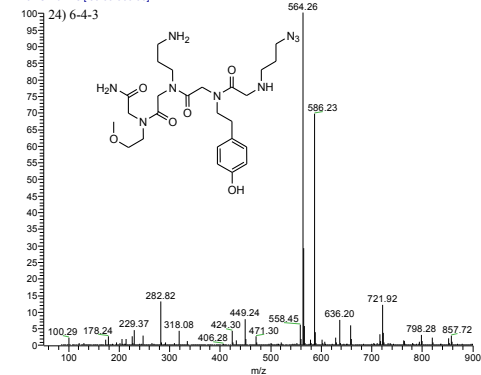

LL-5-159A-25 #4-13 RT: 0.07-0.19 AV: 10 NL: 4.0...  
T: + c ESI Full ms [ 50.00-900.00]

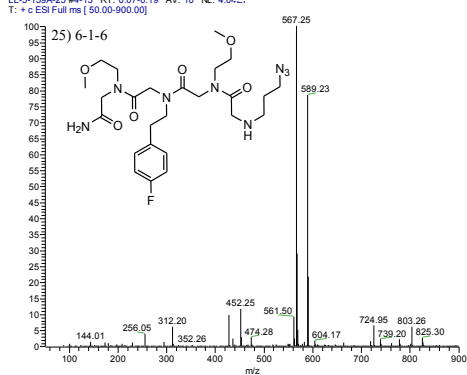

LL-5-159A-27 #4-16 RT: 0.06-0.23 AV: 13 NL: 2.1...  
T: + c ESI Full ms [ 50.00-900.00]

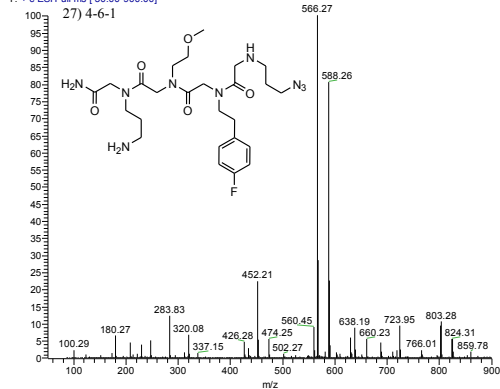

LL-5-159A-28 #5-14 RT: 0.06-0.20 AV: 10 NL: 3.4...  
T: + c ESI Full ms [ 50.00-900.00]

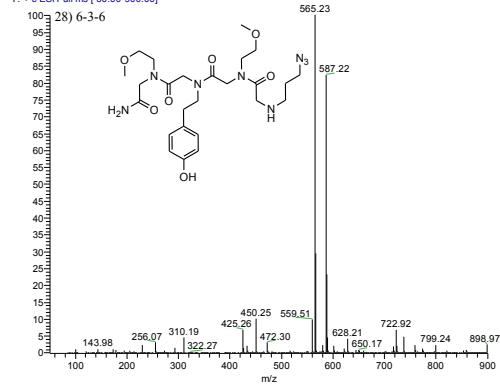

LL-5-159A-32 #5-13 RT: 0.07-0.19 AV: 9 NL: 1.42...  
T: + c ESI Full ms [ 50.00-900.00]

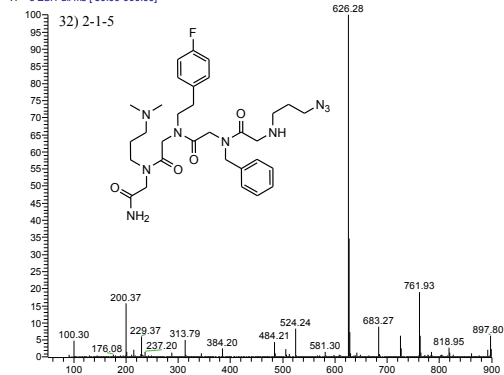

LL-5-159A-34 #4-18 RT: 0.06-0.26 AV: 15 NL: 4.1...  
T: + c ESI Full ms [ 50.00-900.00]

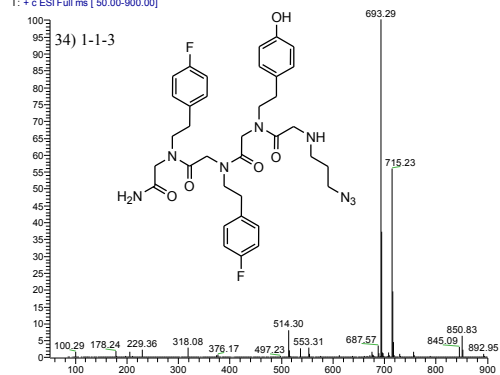

LL-5-159A-35 #4-13 RT: 0.06-0.19 AV: 10 NL: 1.3...  
T: + c ESI Full ms [ 50.00-900.00]

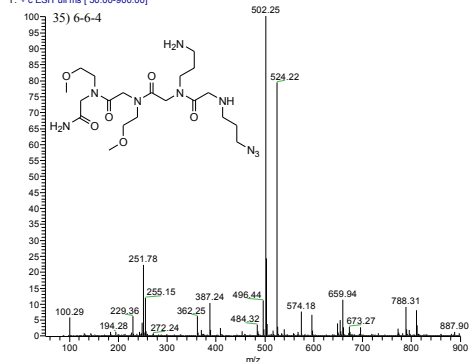

LL-5-159A-36 #4-18 RT: 0.07-0.26 AV: 15 NL: 4.4...  
T: + c ESI Full ms [ 50.00-900.00]

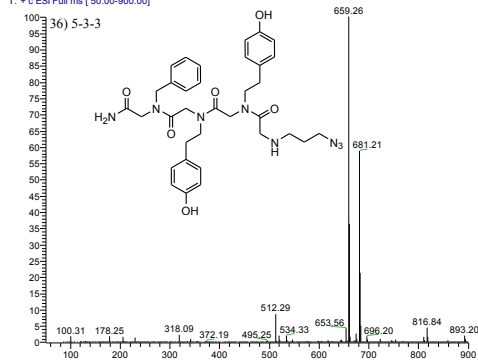

LL-5-159A-37 #4-16 RT: 0.06-0.26 AV: 15 NL: 4.3...  
T: + c ESI Full ms [ 50.00-900.00]

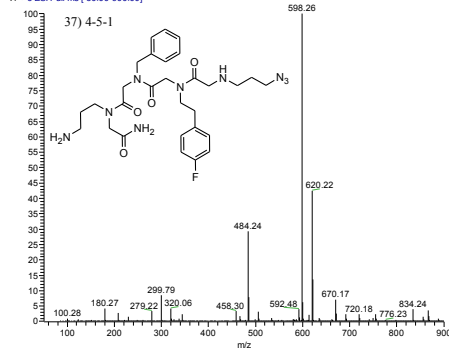

LL-5-159A-38 #5-16 RT: 0.08-0.23 AV: 12 NL: 4.9...  
T: + c ESI Full ms [ 50.00-900.00]

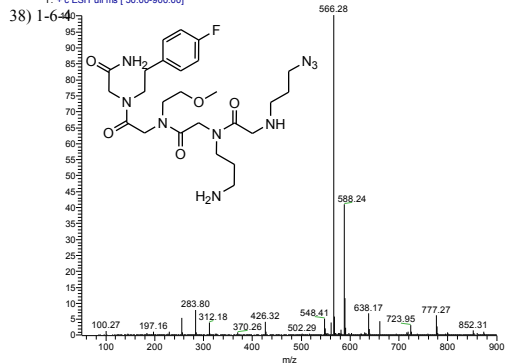

LL-5-159A-39 #4-16 RT: 0.07-0.23 AV: 13 NL: 4.0...  
T: + c ESI Full ms [ 50.00-900.00]

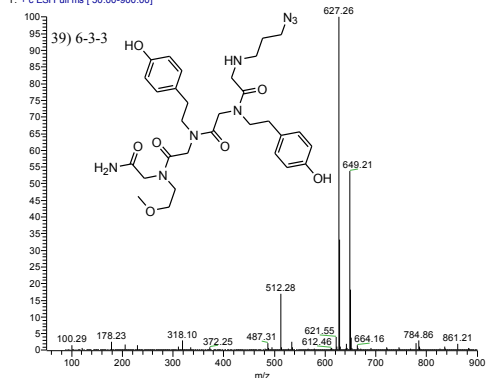

LL-5-159A-40 #9-12 RT: 0.14-0.18 AV: 4 NL: 7.75...  
T: + c ESI Full ms [ 50.00-900.00]

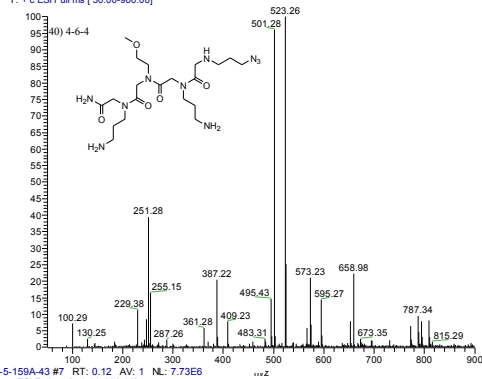

LL-5-159A-42 #4-16 RT: 0.07-0.24 AV: 13 NL: 3.5...  
T: + c ESI Full ms [ 50.00-900.00]

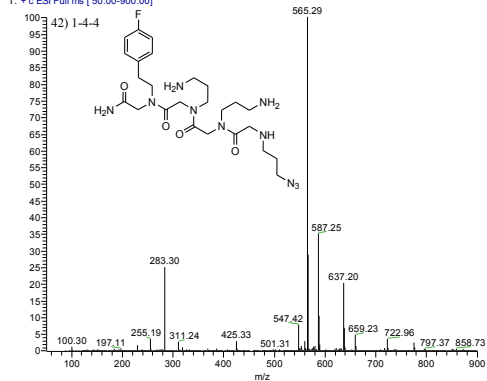

LL-5-159A-43 #7 RT: 0.12 AV: 1 NL: 7.73E6  
T: + c ESI Full ms [ 50.00-900.00]

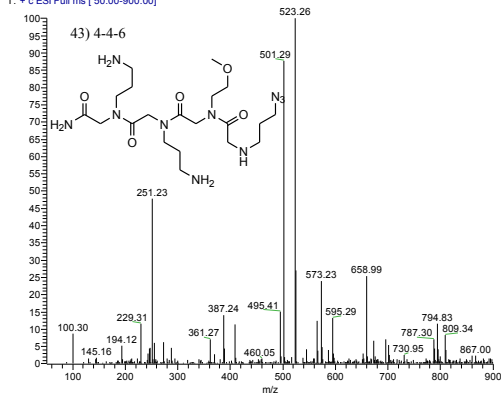





## II (c) Mass Spectral Data for Peptides Library Members

K7\_090702235953 #8 RT: 0.12 AV: 1 NL: 2.8  
T: + c ESI Full ms [200.00-800.00]

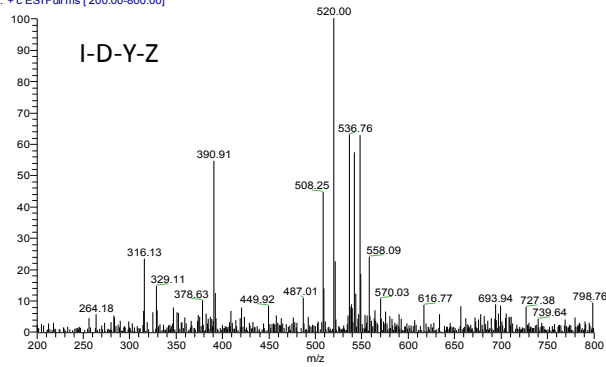

K10 #10 RT: 0.16 AV: 1 NL: 5.59E5  
T: + c ESI Full ms [200.00-800.00]

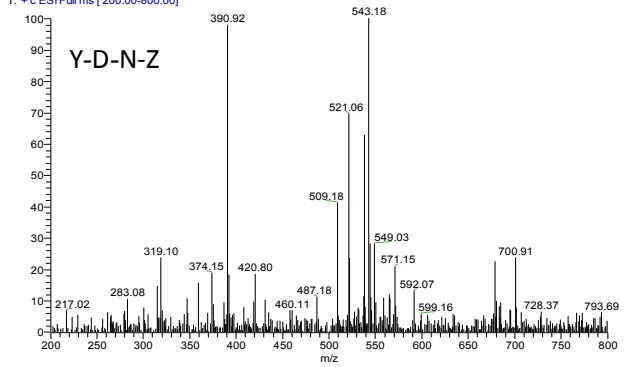

K6 #9 RT: 0.13 AV: 1 NL: 1.67E7  
T: + c ESI Full ms [200.00-800.00]

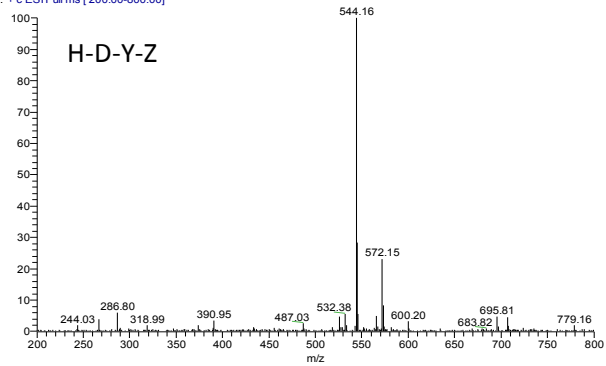

K5 #6 RT: 0.10 AV: 1 NL: 6.41E6  
T: + c ESI Full ms [200.00-800.00]

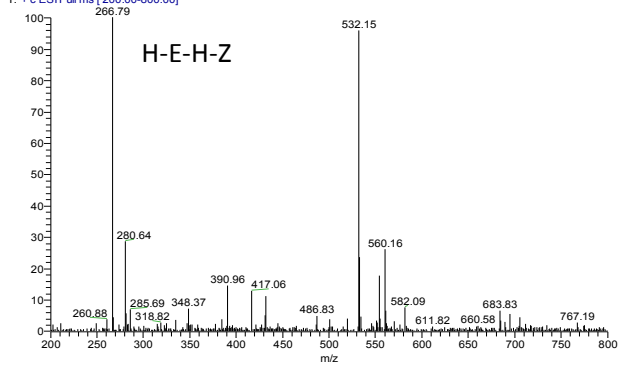

K4 #9 RT: 0.14 AV: 1 NL: 4.03E6  
T: + c ESI Full ms [200.00-800.00]

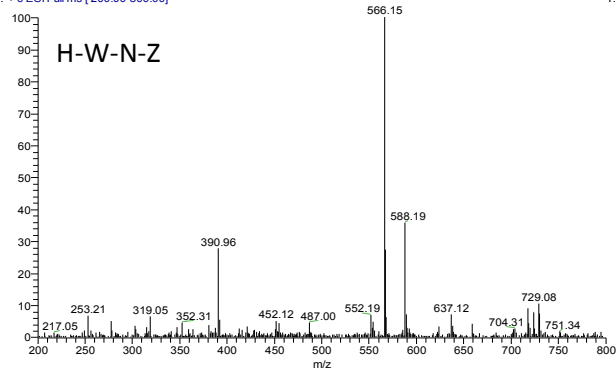

K3 #9 RT: 0.14 AV: 1 NL: 4.82E6  
T: + c ESI Full ms [200.00-800.00]

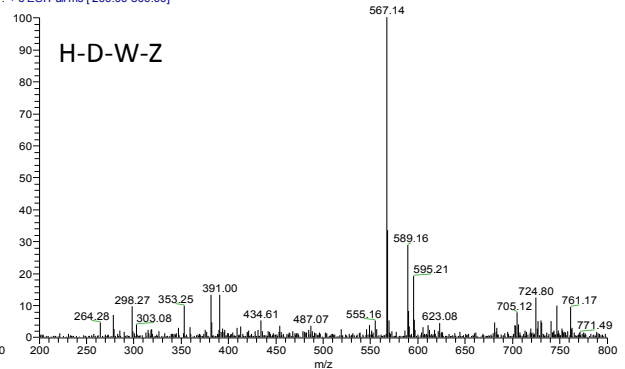

J12 #6 RT: 0.10 AV: 1 NL: 7.80E6  
T: + c ESI Full ms [200.00-800.00]

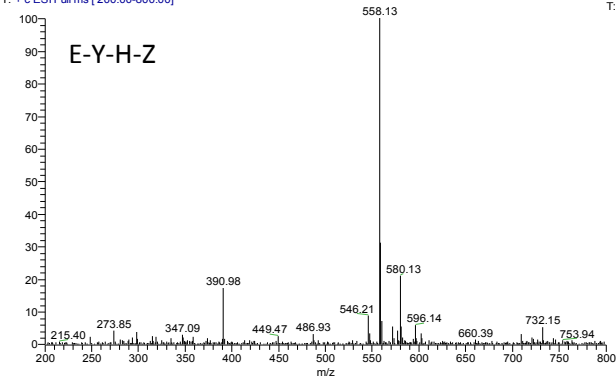

J9 #7 RT: 0.11 AV: 1 NL: 1.70E6  
T: + c ESI Full ms [200.00-800.00]

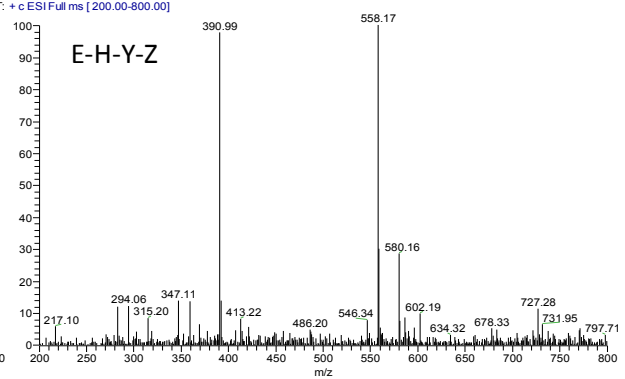

J8 #5 RT: 0.09 AV: 1 NL: 2.21E6  
T: + c ESI Full ms [200.00-800.00]

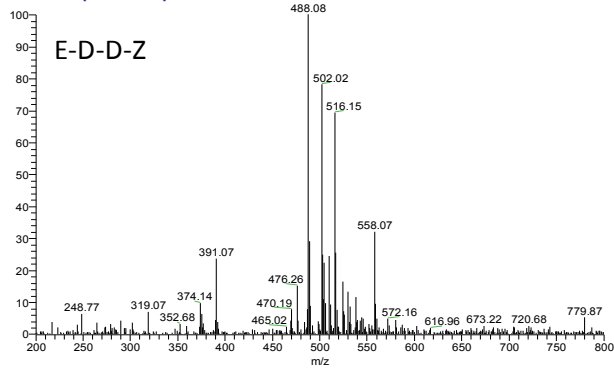

J7 #7 RT: 0.11 AV: 1 NL: 1.28E7  
T: + c ESI Full ms [200.00-800.00]

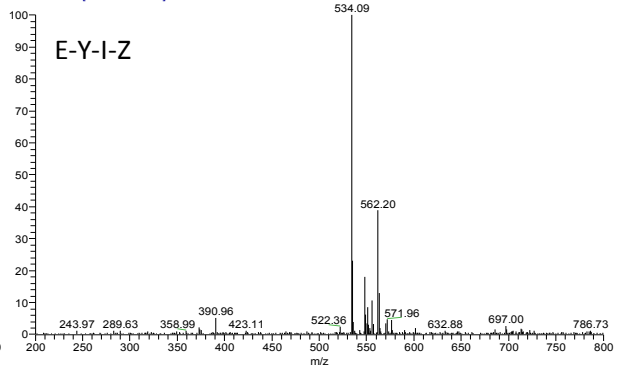

J2\_090702224850 #6 RT: 0.09 AV: 1 NL: 1.21  
T: + c ESI Full ms [200.00-800.00]

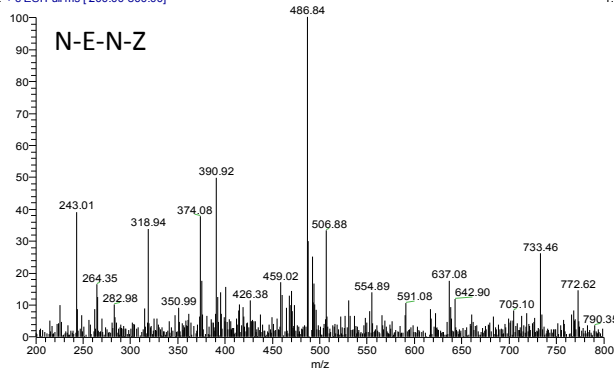

I11 #10 RT: 0.15 AV: 1 NL: 1.10E7  
T: + c ESI Full ms [200.00-800.00]

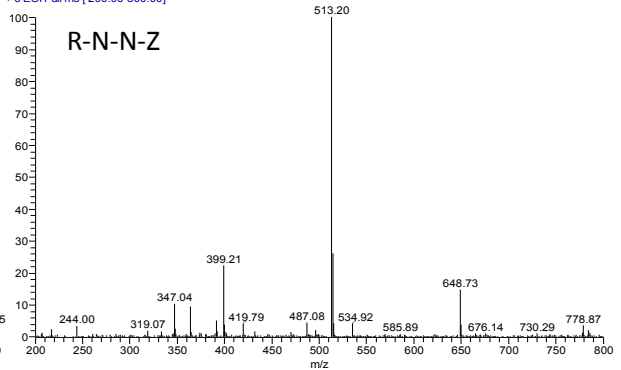

I7 #9 RT: 0.13 AV: 1 NL: 5.07E7  
T: + c ESI Full ms [200.00-800.00]

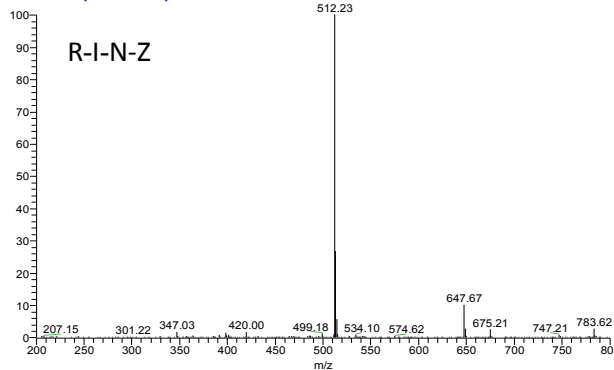

I6 #8 RT: 0.12 AV: 1 NL: 1.13E7  
T: + c ESI Full ms [200.00-800.00]

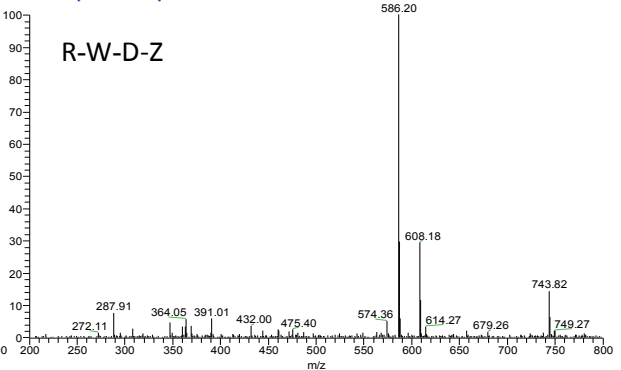

I5 #11 RT: 0.16 AV: 1 NL: 9.28E6  
T: + c ESI Full ms [200.00-800.00]

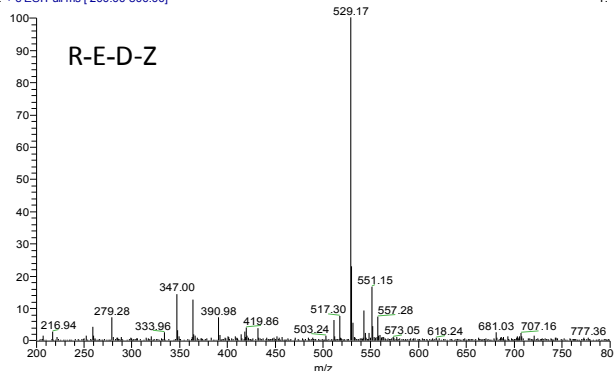

I3 #6 RT: 0.10 AV: 1 NL: 1.91E7  
T: + c ESI Full ms [200.00-800.00]

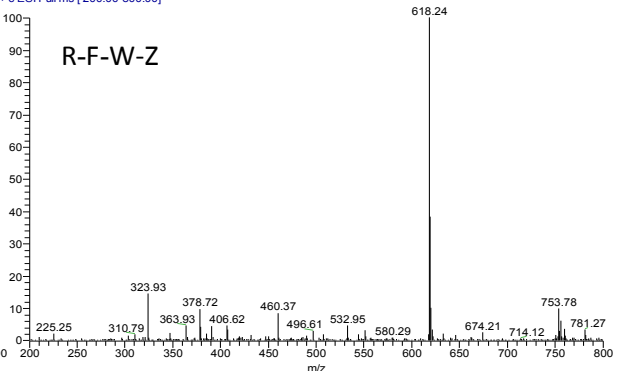

I2#5-19 RT: 0.09-0.25 AV: 15 NL: 4.92E6  
T: + c ESI Full ms [ 200.00-800.00]

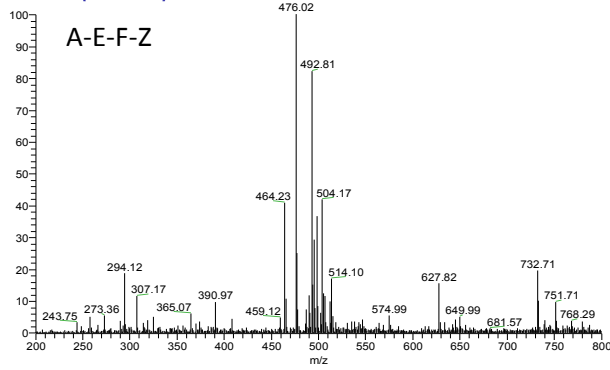

H12#8 RT: 0.13 AV: 1 NL: 5.50E6  
T: + c ESI Full ms [ 200.00-800.00]

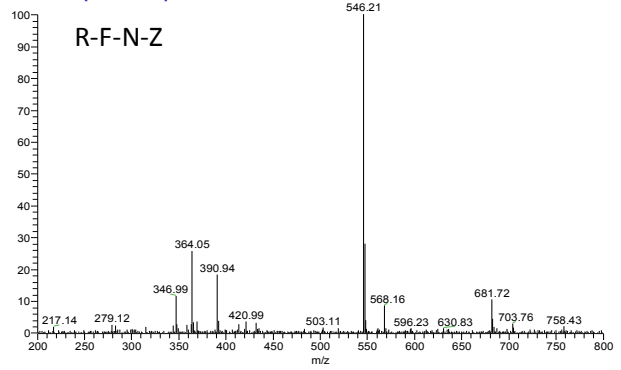

H11#9 RT: 0.13 AV: 1 NL: 9.79E6  
T: + c ESI Full ms [ 200.00-800.00]

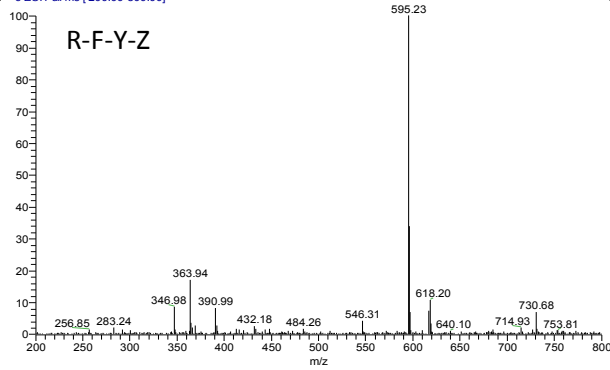

H10#8 RT: 0.12 AV: 1 NL: 1.10E7  
T: + c ESI Full ms [ 200.00-800.00]

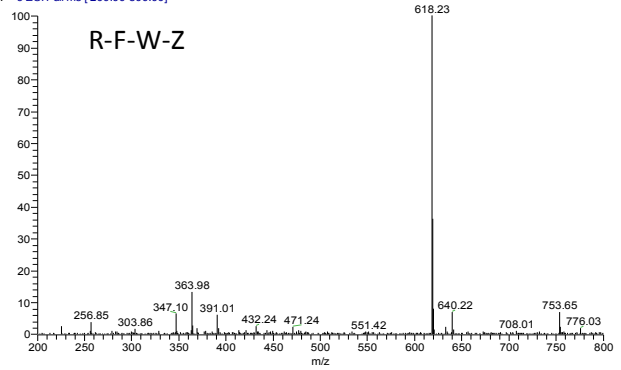

H08#9 RT: 0.13 AV: 1 NL: 6.77E5  
T: + c ESI Full ms [ 200.00-800.00]

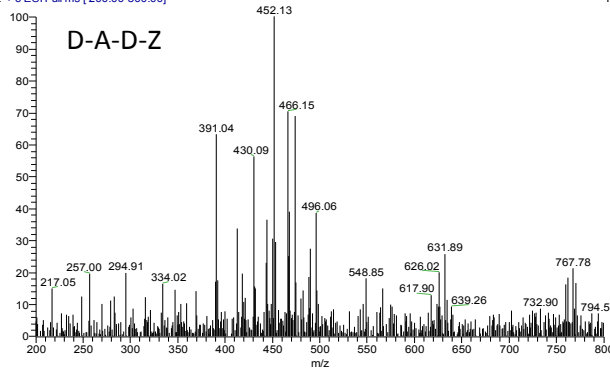

H07#8 RT: 0.12 AV: 1 NL: 3.14E6  
T: + c ESI Full ms [ 200.00-800.00]

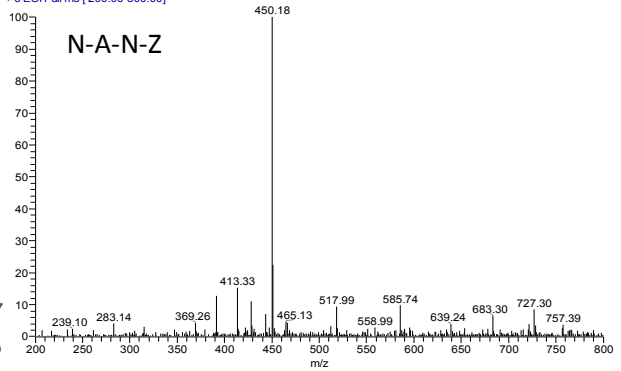

H06#8 RT: 0.12 AV: 1 NL: 2.50E6  
T: + c ESI Full ms [ 200.00-800.00]

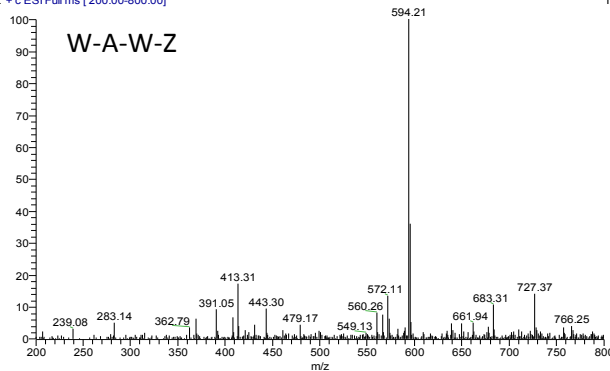

H05#7 RT: 0.12 AV: 1 NL: 2.04E6  
T: + c ESI Full ms [ 200.00-800.00]

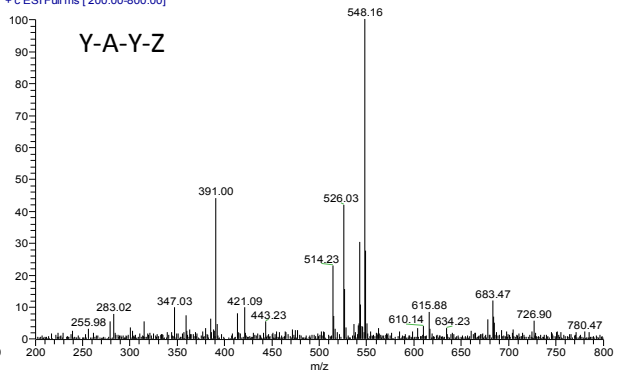

H04 #7 RT: 0.12 AV: 1 NL: 1.19E6  
T: + c ESI Full ms [200.00-800.00]

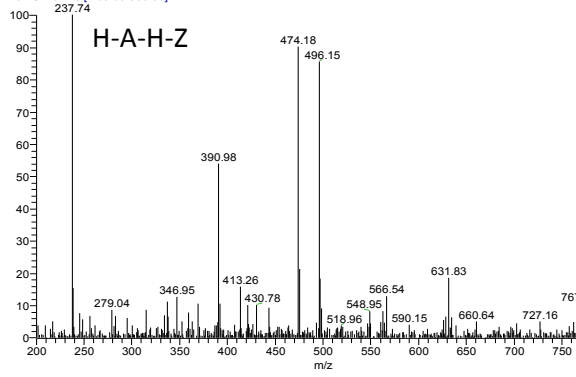

H03 #9 RT: 0.13 AV: 1 NL: 6.34E6  
T: + c ESI Full ms [200.00-800.00]

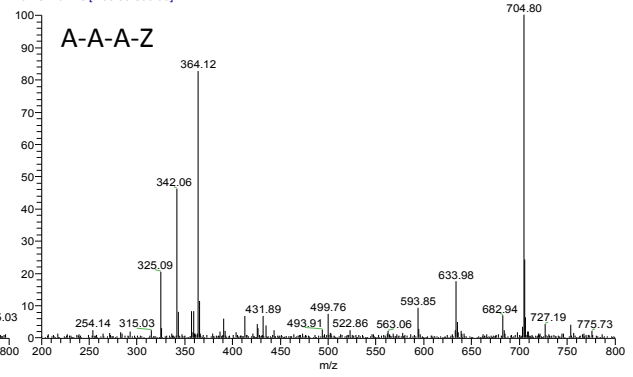

H02 #10 RT: 0.13 AV: 1 NL: 8.08E6  
T: + c ESI Full ms [200.00-800.00]

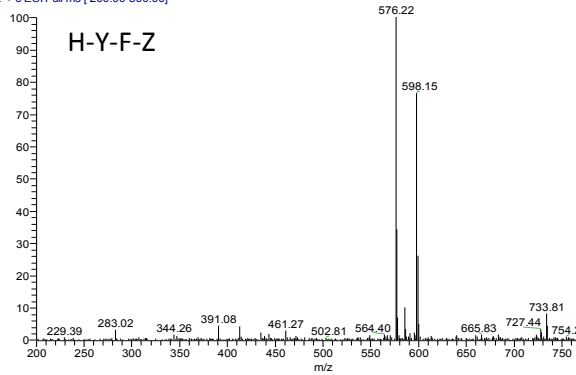

G12 #9 RT: 0.13 AV: 1 NL: 1.05E7  
T: + c ESI Full ms [200.00-800.00]

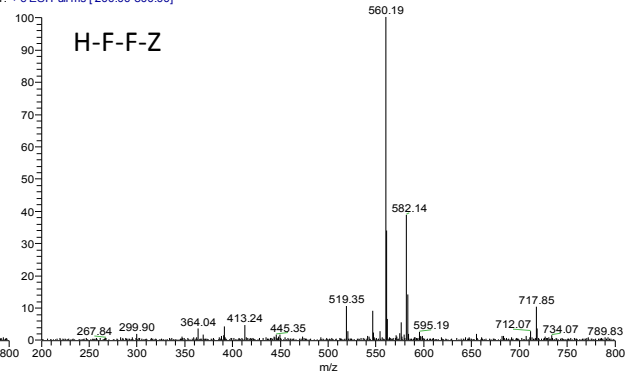

G09 #7 RT: 0.10 AV: 1 NL: 2.96E6  
T: + c ESI Full ms [200.00-800.00]

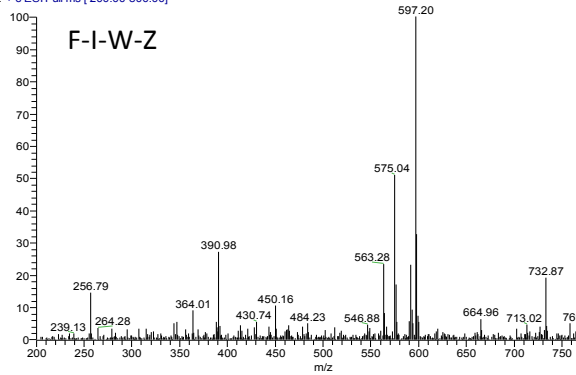

G08 #10 RT: 0.14 AV: 1 NL: 1.28E6  
T: + c ESI Full ms [200.00-800.00]

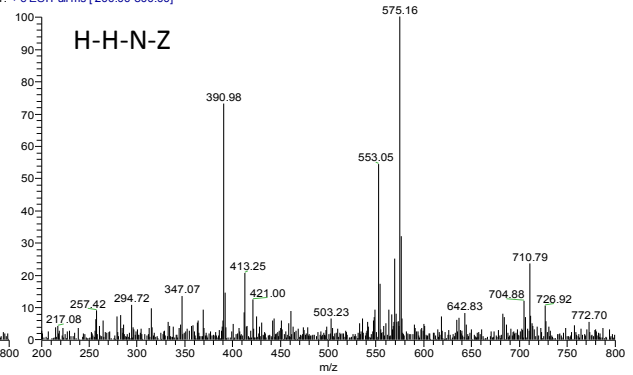

G07 #9 RT: 0.12 AV: 1 NL: 8.56E6  
T: + c ESI Full ms [200.00-800.00]

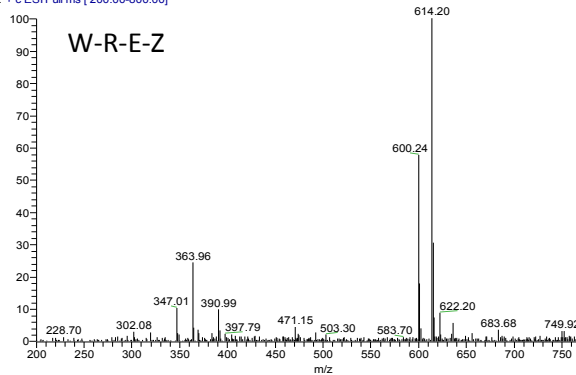

G4\_090702211110 #10 RT: 0.13 AV: 1 NL: 7.  
T: + c ESI Full ms [200.00-800.00]

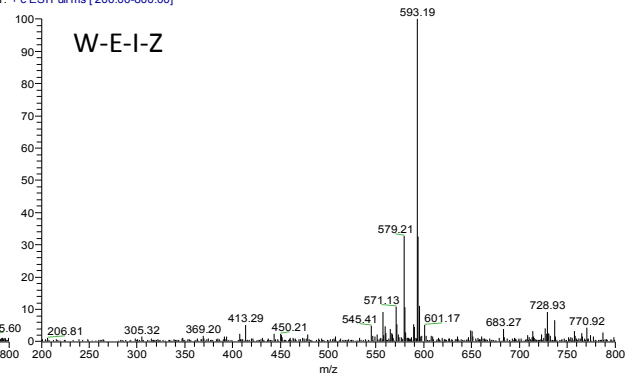

G6\_090702210948 #9 RT: 0.12 AV: 1 NL: 8.5  
T: + c ESI Full ms [200.00-800.00]

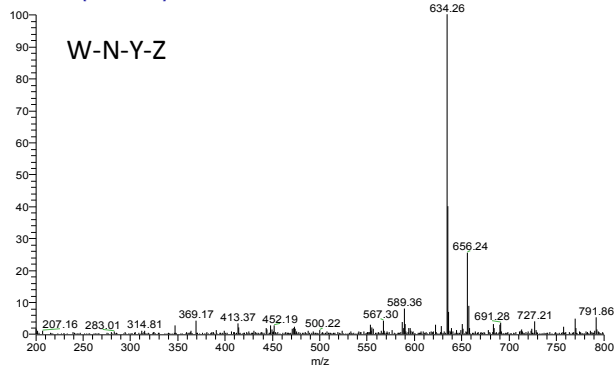

G5\_090702003407 #8 RT: 0.12 AV: 1 NL: 2.9  
T: + c ESI Full ms [200.00-800.00]

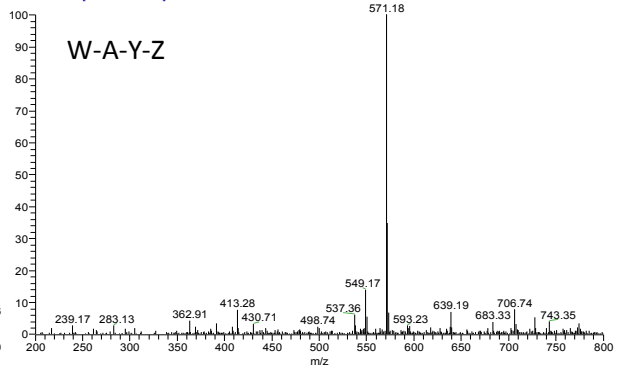

G3\_090702002604 #8 RT: 0.13 AV: 1 NL: 1.1  
T: + c ESI Full ms [200.00-800.00]

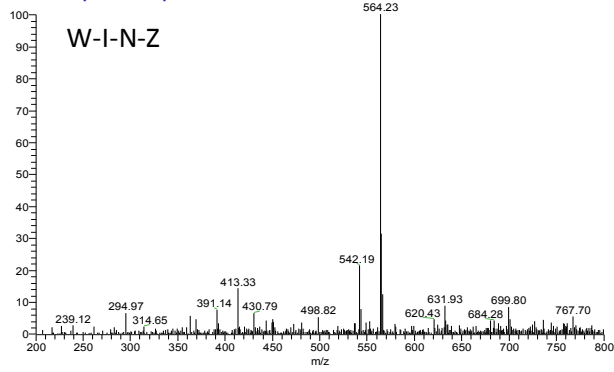

G1 #11 RT: 0.14 AV: 1 NL: 9.42E6  
T: + c ESI Full ms [200.00-800.00]

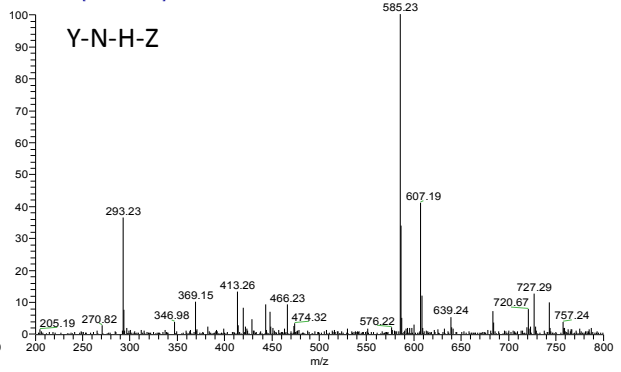

F12 #7 RT: 0.11 AV: 1 NL: 1.54E6  
T: + c ESI Full ms [200.00-800.00]

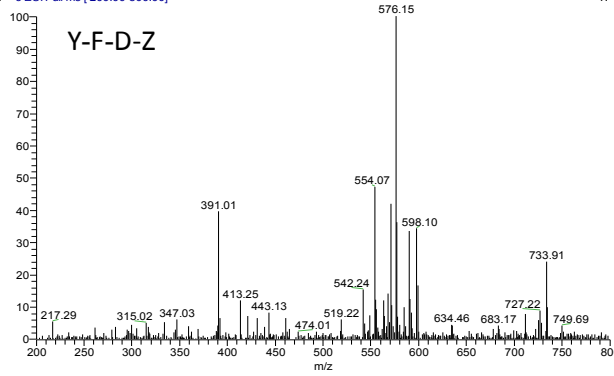

F11 #6 RT: 0.10 AV: 1 NL: 1.09E7  
T: + c ESI Full ms [200.00-800.00]

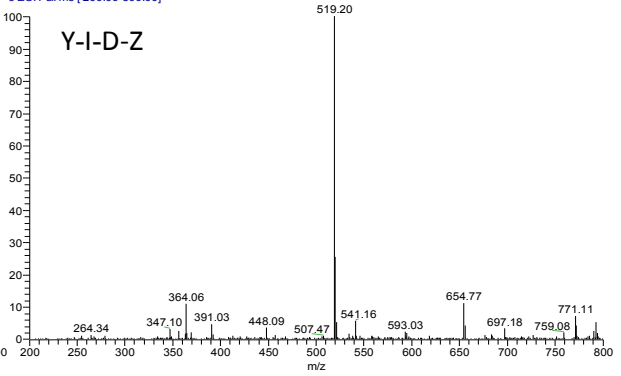

F9 #8 RT: 0.12 AV: 1 NL: 1.80E7  
T: + c ESI Full ms [200.00-800.00]

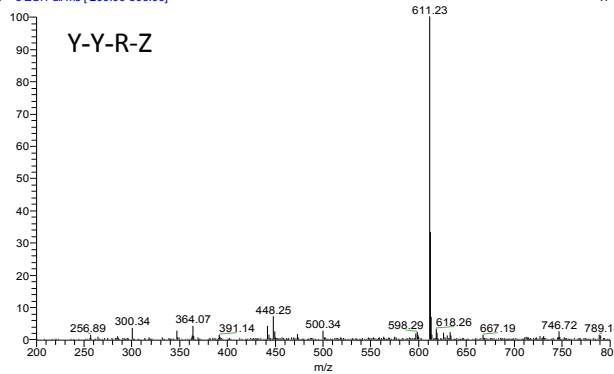

F4 #9 RT: 0.13 AV: 1 NL: 5.13E7  
T: + c ESI Full ms [200.00-800.00]

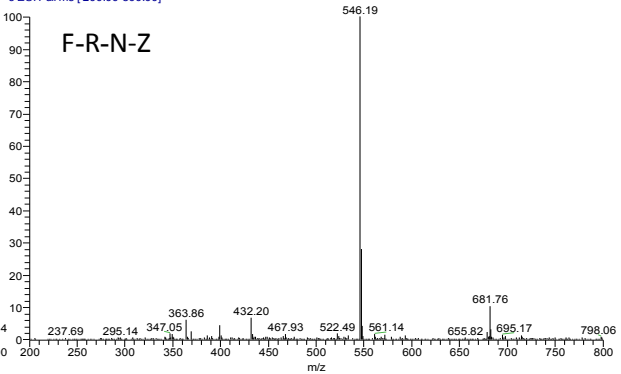

F3 #10 RT: 0.14 AV: 1 NL: 3.12E7  
T: + c ESI Full ms [200.00-800.00]

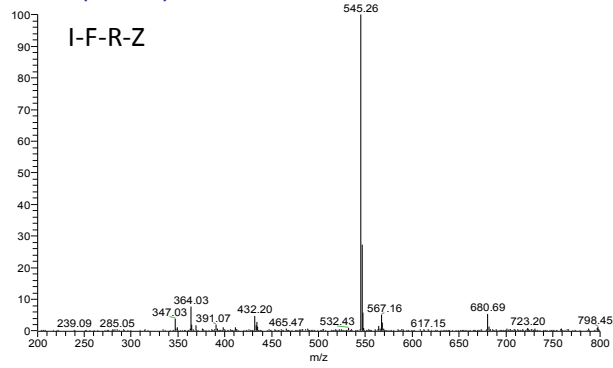

F1 #9 RT: 0.12 AV: 1 NL: 6.60E6  
T: + c ESI Full ms [200.00-800.00]

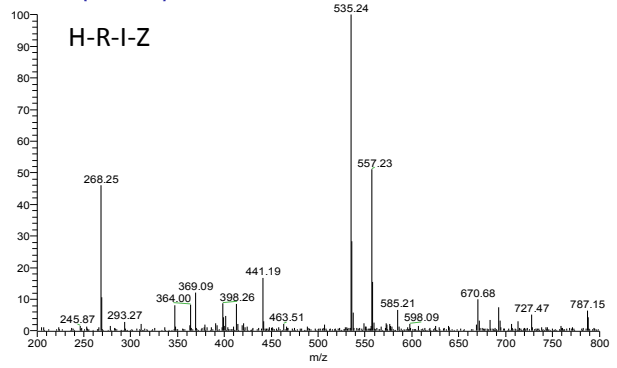

E10 #9 RT: 0.12 AV: 1 NL: 6.35E6  
T: + c ESI Full ms [200.00-800.00]

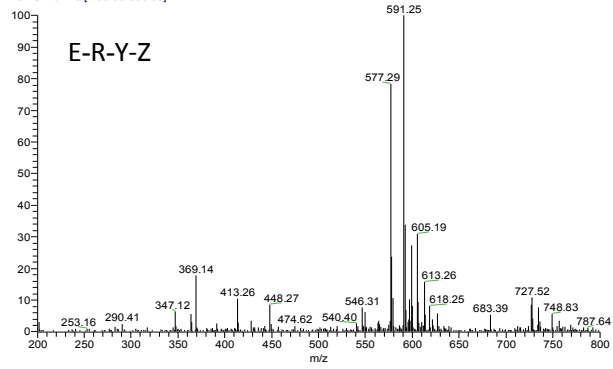

E09 #9 RT: 0.13 AV: 1 NL: 1.20E7  
T: + c ESI Full ms [200.00-800.00]

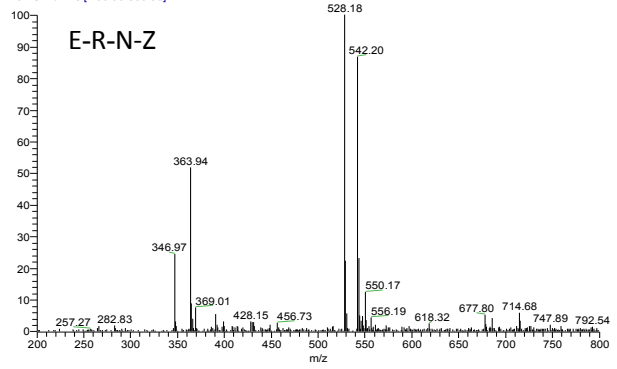

E08 #10 RT: 0.14 AV: 1 NL: 1.48E7  
T: + c ESI Full ms [200.00-800.00]

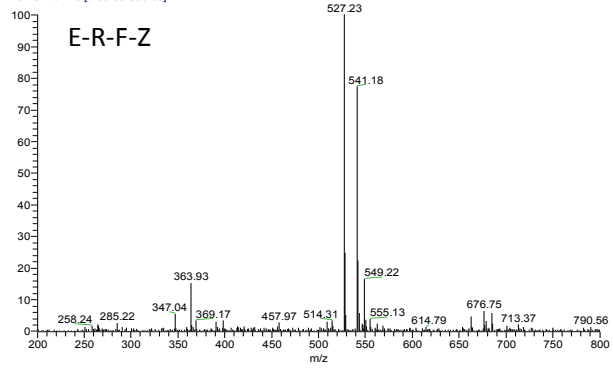

E07 #9 RT: 0.13 AV: 1 NL: 1.35E7  
T: + c ESI Full ms [200.00-800.00]

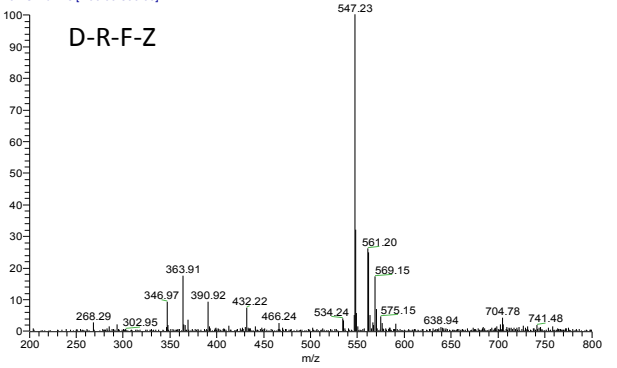

E06 #8 RT: 0.11 AV: 1 NL: 2.41E7  
T: + c ESI Full ms [200.00-800.00]

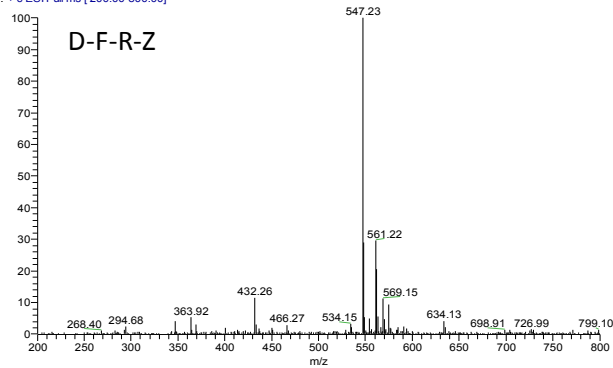

E04 #9 RT: 0.12 AV: 1 NL: 3.11E7  
T: + c ESI Full ms [200.00-800.00]

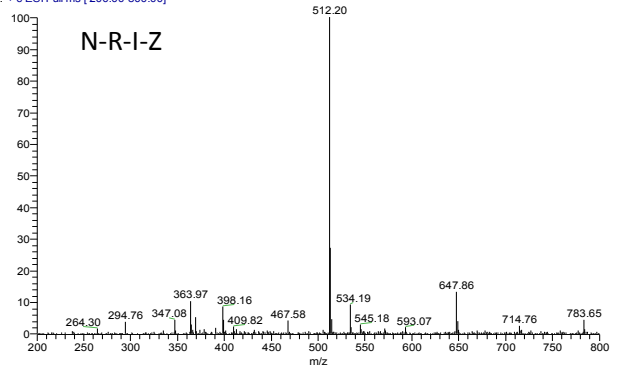

E03 #9 RT: 0.13 AV: 1 NL: 4.62E6  
T: + c ESI Full ms [ 200.00-800.00]

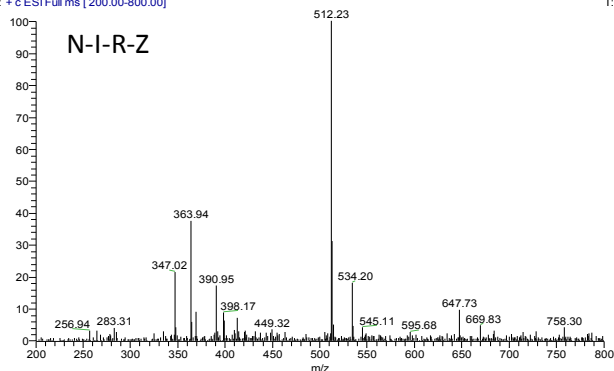

E02 #9 RT: 0.13 AV: 1 NL: 2.43E6  
T: + c ESI Full ms [ 200.00-800.00]

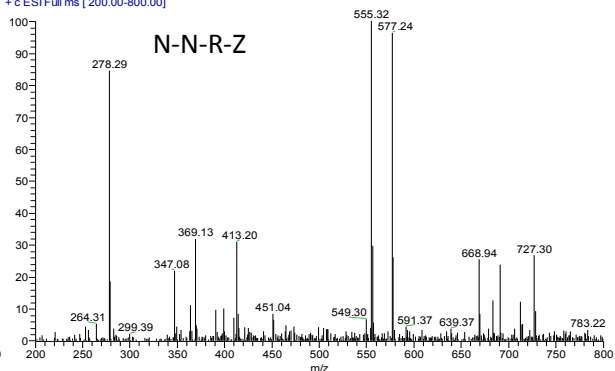

E1 #11 RT: 0.14 AV: 1 NL: 5.23E7  
T: + c ESI Full ms [ 200.00-800.00]

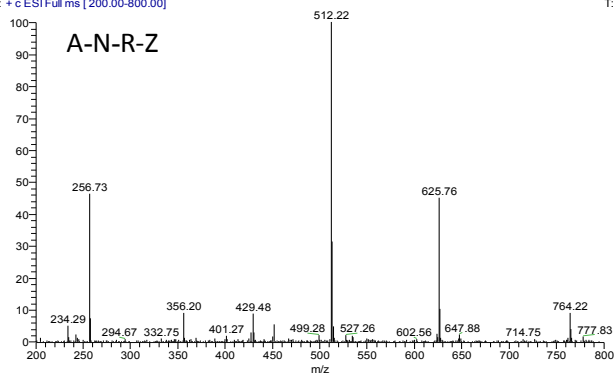

D05 #18 RT: 0.23 AV: 1 NL: 1.15E6  
T: + c ESI Full ms [ 200.00-800.00]

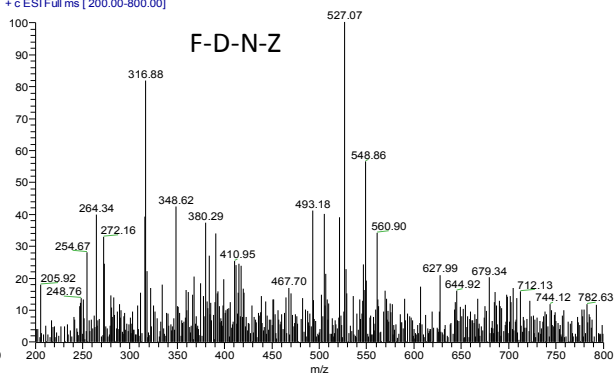

D04 #11 RT: 0.14 AV: 1 NL: 6.31E6  
T: + c ESI Full ms [ 200.00-800.00]

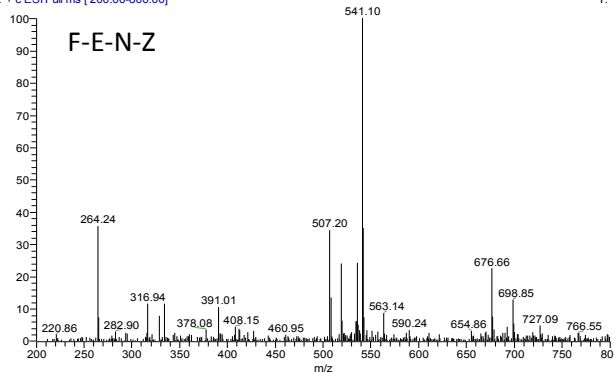

D03 #10 RT: 0.13 AV: 1 NL: 7.60E6  
T: + c ESI Full ms [ 200.00-800.00]

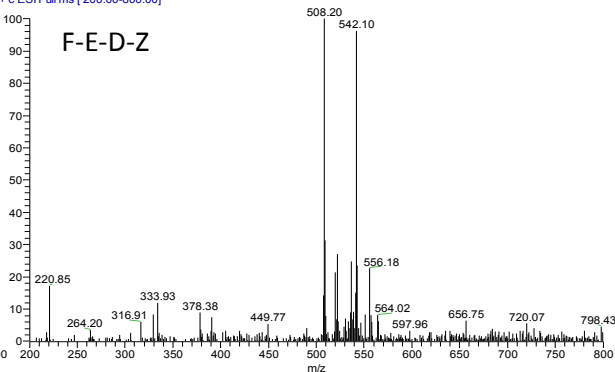

C12 #9 RT: 0.12 AV: 1 NL: 6.67E6  
T: + c ESI Full ms [ 200.00-800.00]

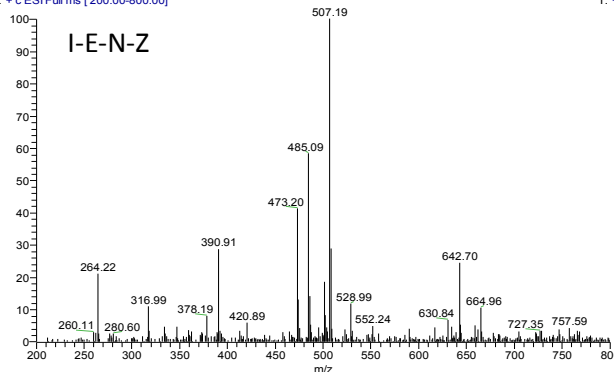

C11 #12 RT: 0.14 AV: 1 NL: 1.45E7  
T: + c ESI Full ms [ 200.00-800.00]

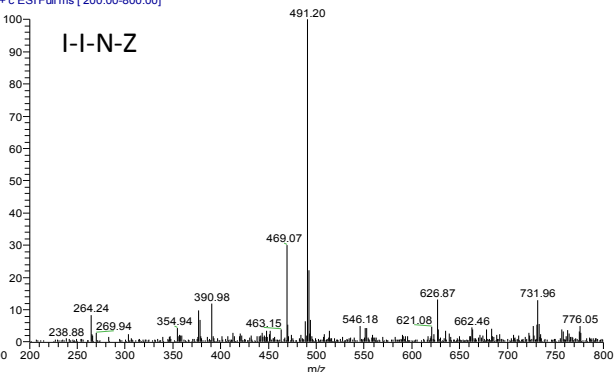



C10 #11 RT: 0.14 AV: 1 NL: 3.17E7  
T: + c ESI Full ms [ 200.00-800.00]

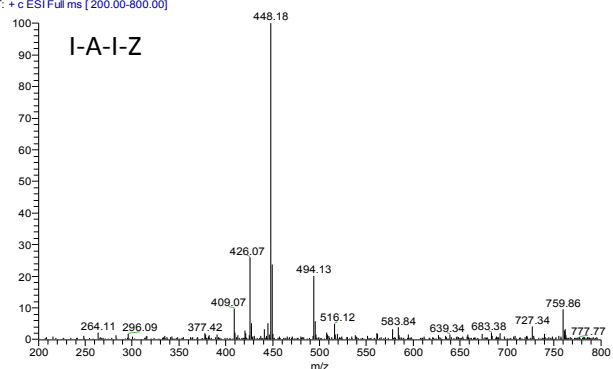

K7\_090702235953 #8 RT: 0.12 AV: 1 NL: 2.8  
T: + c ESI Full ms [ 200.00-800.00]

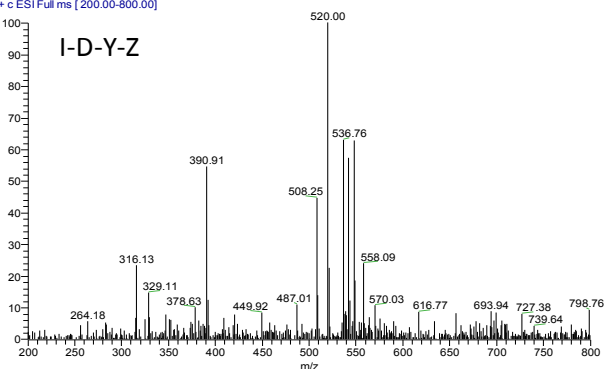

C8 #13 RT: 0.18 AV: 1 NL: 1.42E7  
T: + c ESI Full ms [ 100.00-900.00]

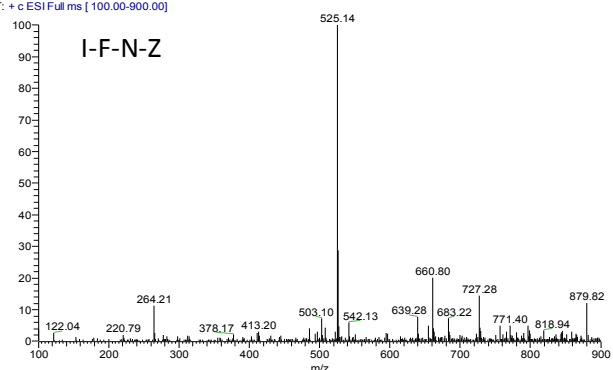

C7 #11 RT: 0.16 AV: 1 NL: 1.01E7  
T: + c ESI Full ms [ 100.00-900.00]

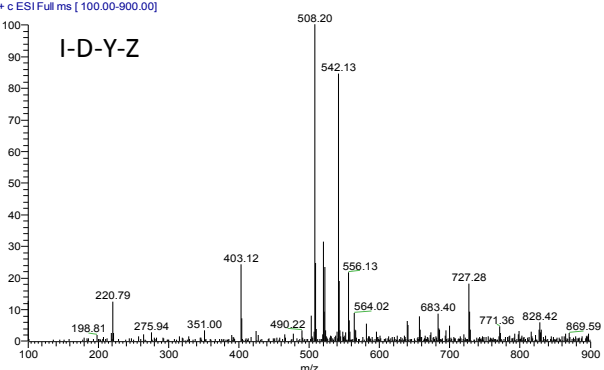

C6 #12 RT: 0.17 AV: 1 NL: 3.96E7  
T: + c ESI Full ms [ 100.00-900.00]

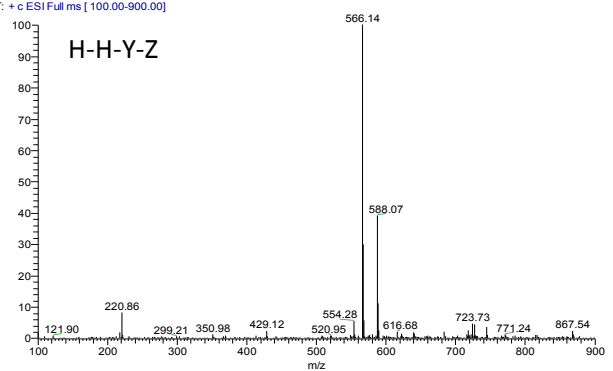

C5 #9 RT: 0.13 AV: 1 NL: 1.22E7  
T: + c ESI Full ms [ 100.00-900.00]

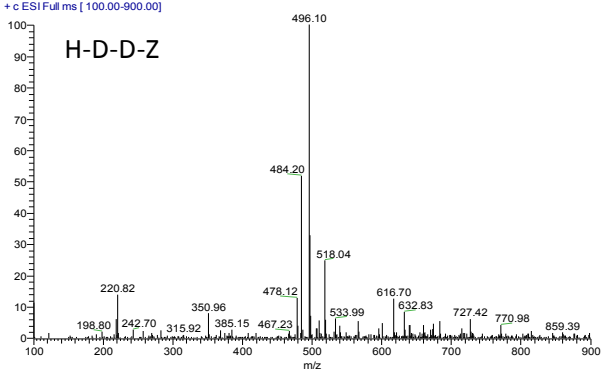

B1\_090531134624 #10 RT: 0.14 AV: 1 NL: 1.  
T: + c ESI Full ms [ 100.00-900.00]

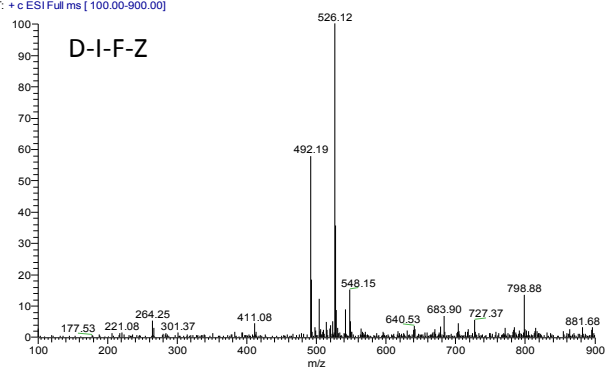

L5 #7 RT: 0.11 AV: 1 NL: 2.30E6  
T: + c ESI Full ms [ 200.00-800.00]

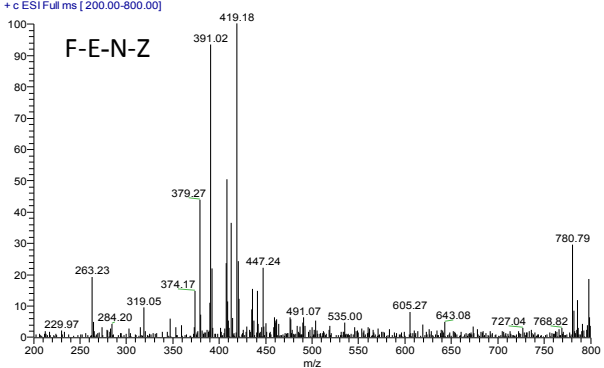

L3 #7 RT: 0.12 AV: 1 NL: 1.79E6  
T: + c ESI Full ms [200.00-800.00]

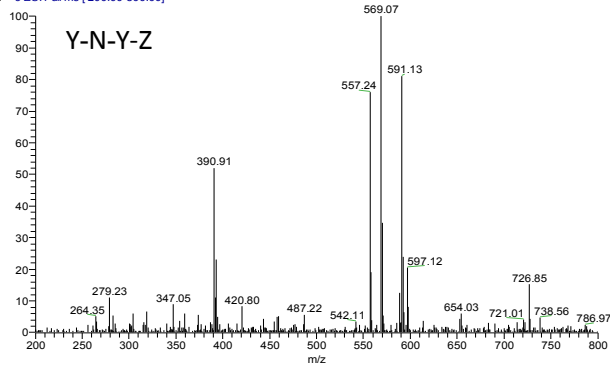

L2 #7 RT: 0.11 AV: 1 NL: 1.04E7  
T: + c ESI Full ms [200.00-800.00]

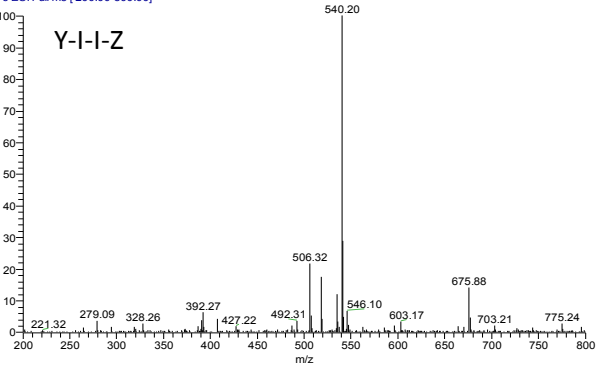

L1 #8 RT: 0.12 AV: 1 NL: 1.62E6  
T: + c ESI Full ms [200.00-800.00]

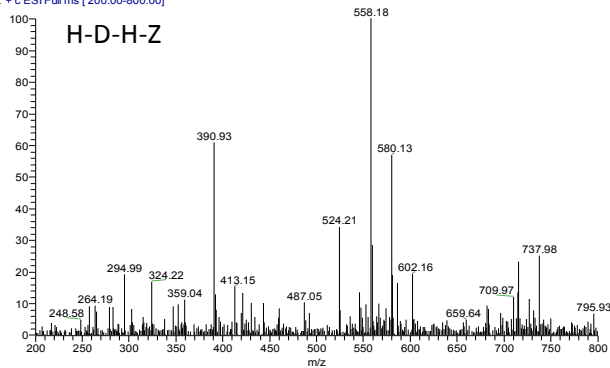

K8\_090703000334 #7 RT: 0.11 AV: 1 NL: 1.2  
T: + c ESI Full ms [200.00-800.00]

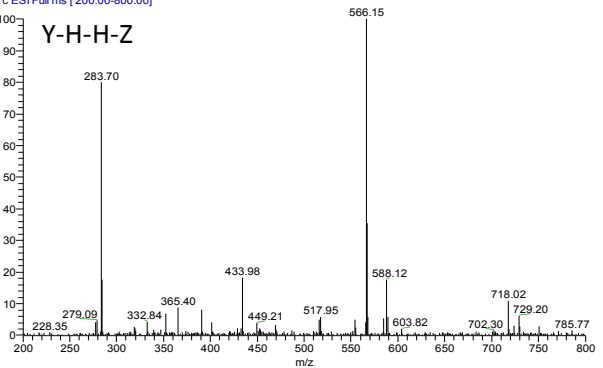

866 #9 RT: 0.13 AV: 1 NL: 7.93E6  
T: + c ESI Full ms [100.00-900.00]

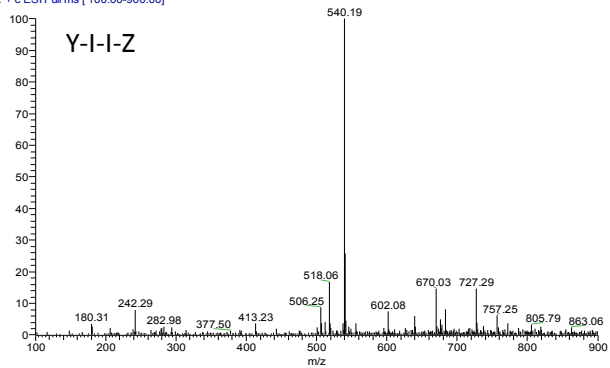

if-2-088-A09 #9 RT: 0.14 AV: 1 NL: 1.24E7  
T: + c ESI Full ms [100.00-900.00]

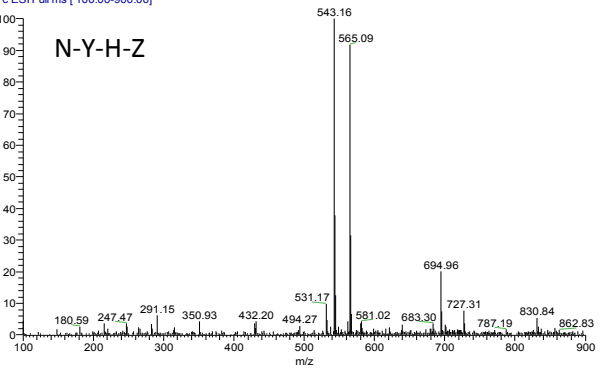

if-2-088-A05 #11 RT: 0.16 AV: 1 NL: 6.07E6  
T: + c ESI Full ms [100.00-900.00]

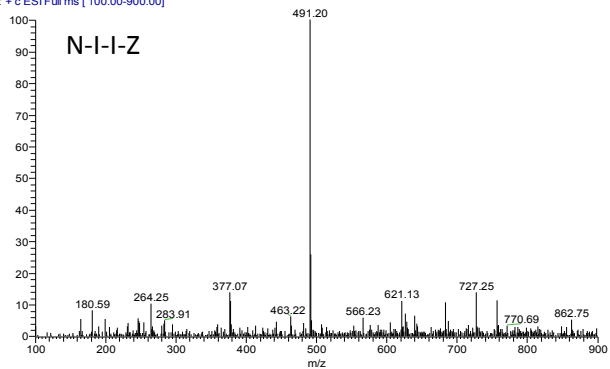

if-2-088-A04\_090527225401 #11 RT: 0.17 AV: 1 NL: 3.05E6  
T: + c ESI Full ms [100.00-900.00]

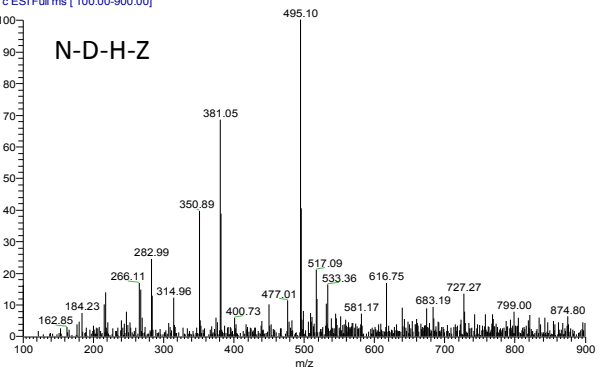

JF-2-088-A03\_090527224435 #11 RT: 0.17 AV:  
T: + c ESI Full ms [ 100.00-900.00]

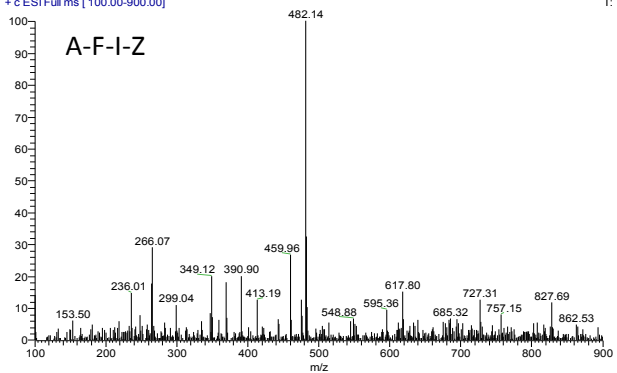

JF-2-88-239 #8 RT: 0.12 AV: 1 NL: 2.35E6  
T: + c ESI Full ms [ 100.00-900.00]

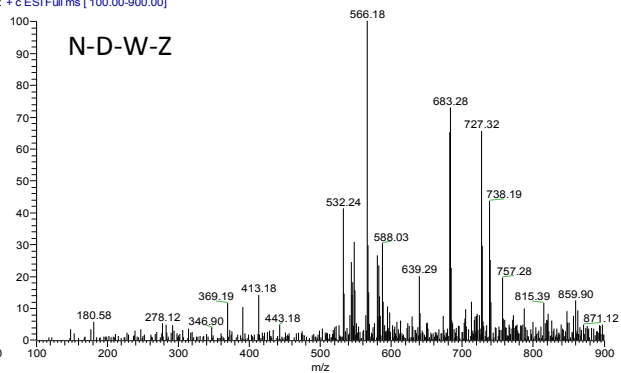

## II (d) NMR, IR, and HR-MS characterization of

### ABI (15-AB-21)

HRMS: Calculated mass: 588.2684 (M+H); observed mass: 558.2677

$^1\text{H}$  (CD<sub>3</sub>OD, 400MHz)  $\delta$  9.01 (2H, d, J=6.91), 7.7-7.38 (9H, m), 4.92 (4H, s), 4.52 (2H, t, J=13.07), 3.32 (6H, m), 1.30 (4H, m)

$^{13}\text{C}$ -NMR (CD<sub>3</sub>OD, 100MHz)  $\delta$  173.09, 171.00, 162.72, 162.36, 151.08, 136.86, 136.79, 136.66, 133.06, 132.29, 128.75, 128.70, 124.01, 123.40, 121.14, 121.10, 113.04, 112.77, 111.82, 111.56, 52.98, 52.89, 46.86, 46.37, 45.89, 29.30, 27.92

IR (thin film): 981, 1026, 1121, 1232, 1370, 2072, 2236, 2487, 2909, 2977, 3334 cm<sup>-1</sup>

### ABII (11-AB-25)

HRMS: Calculated mass: 697.2792 (M+H); observed mass: 697.2784

$^1\text{H}$  (CD<sub>3</sub>OD, 400MHz)  $\delta$  8.14 (2H, d, J= 6.02), 7.91 (1H, s), 7.56-7.38 (3H, m), 4.94 (4H, s), 3.73 (1H, m), 3.32 (6H, m), 3.09 (2H, m), 2.99 (3H, d, J=5.95), 1.93-1.63 (4H, m), 1.3 (4H,m)

$^{13}\text{C}$ -NMR (CD<sub>3</sub>OD, 100MHz)  $\delta$  172.42, 171.58, 171.08, 162.47, 162.12, 150.71, 140.21, 134.55, 134.20, 128.54, 125.84, 123.74, 113.67, 112.50, 112.25, 68.87, 57.27, 53.44, 46.52, 46.41, 30.77, 30.59, 29.98, 27.88, 23.75

IR (thin film): 981, 1028, 1122, 1231, 1448, 2072, 2222, 2489, 2832, 2909, 2936, 2956, 3322 cm<sup>-1</sup>

### ABIII (15-AB-25)

HRMS: Calculated mass: 694.2431 (M+H); observed mass: 694.2430

$^1\text{H}$  (CD<sub>3</sub>OD, 400MHz)  $\delta$  9.01 (2H, d, J=6.91), 7.66-7.10 (7H, m), 4.92 (4H, s), 4.52 (2H, t, J=13.07), 3.32 (6H, m), 1.30 (4H, m)

IR (thin film): 982, 1025, 1122, 1231, 1445, 2072, 2489, 2830, 2944, 3320 cm<sup>-1</sup>

### ABIV (19-AB-25)

HRMS: Calculated mass: 643.2322 (M+H); observed mass: 643.2315

$^1\text{H}$  (CD<sub>3</sub>OD, 400MHz)  $\delta$  8.14 (2H, d, J=6.84), 7.94 (1H, s), 8.13-7.41 (3H, m), 4.93 (4H, s), 3.33 (6H, m), 2.06 (2H, m), 1.33 (4H, m)

IR (thin film): 979, 1027, 1122, 1232, 1366, 2072, 2234, 2482, 2900, 2972, 3316 cm<sup>-1</sup>

**ABV (15-AB-26)**

HRMS: Calculated mass: 588.2789 (M+H); observed mass: 588.2782

$^1\text{H}$  ( $\text{CD}_3\text{OD}$ , 400MHz)  $\delta$  9.01 (2H, d,  $J=6.91$ ), 7.66-7.10 (7H, m), 4.92 (4H, s), 4.52 (2H, t,  $J=13.99$ ), 3.88 (3H, s) 3.32 (6H, m), 1.30 (4H, m)

IR (thin film): 981, 1025, 1122, 1155, 1232, 1446, 2072, 2253, 2832, 2913, 2941, 3335  $\text{cm}^{-1}$

### Section III

#### III (a) Screening of Small molecule libraries via microarray

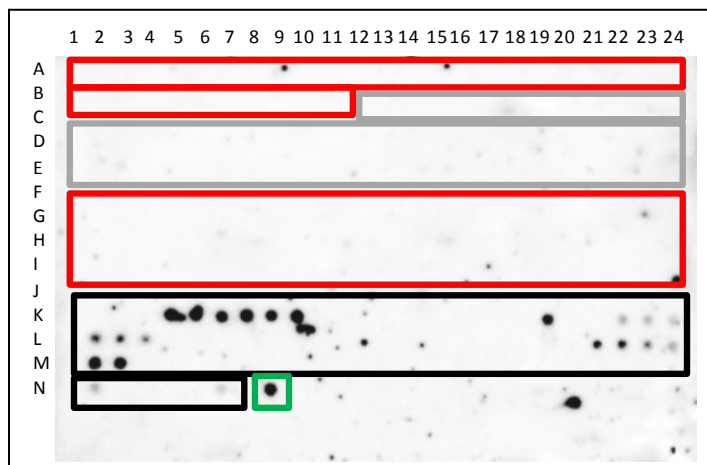

**Figure S-1:** Microarray screening of a small molecule library containing peptoids, peptides, and 2-aminobenzimidazoles for binding **1**. Image of the microarray with all 284 ligands after hybridization with  $^{32}\text{P}$ -labeled **1**. The peptoid library members are outlined in red (0 hits), peptide library members are outlined in grey (0 hits), 2-aminobenzimidazole members are outlined in black (19 hits), and the positive control is outlined in green.

**Section IV. RNA-PSP analysis: Sum Z-scores for ABI – ABV**

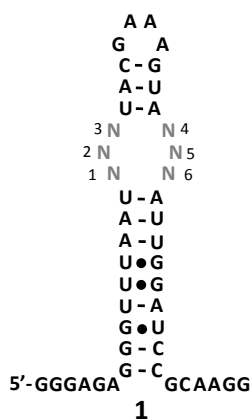

**Table S-1:** Sequences of all selected loops for **ABI** and their corresponding sum Z-scores. The position where each nucleotide occurs is indicated in secondary structure of **1** above.

| S. No | Loop      | 1 | 2 | 3 | 4 | 5 | 6 | Σ Z-Score |
|-------|-----------|---|---|---|---|---|---|-----------|
| 1     | ABI IL 1  | G | C | U | C | C | G | 51.37     |
| 2     | ABI IL 2  | G | C | U | C | U | G | 51.41     |
| 3     | ABI IL 3  | A | C | C | G | U | C | 55.73     |
| 4     | ABI IL 4  | A | U | G | G | U | C | 51.24     |
| 5     | ABI IL 5  | G | G | U | C | C | C | 49.30     |
| 6     | ABI IL 6  | G | C | U | C | A | C | 48.77     |
| 7     | ABI IL 7  | A | G | G | G | U | C | 48.56     |
| 8     | ABI IL 8  | A | C | G | G | C | C | 47.27     |
| 9     | ABI IL 9  | U | A | U | C | A | U | 44.90     |
| 10    | ABI IL 10 | U | A | U | C | A | U | 44.90     |
| 11    | ABI IL 11 | G | A | U | C | C | A | 43.52     |
| 12    | ABI IL 12 | A | C | A | G | A | C | 41.13     |
| 13    | ABI IL 13 | U | C | C | G | G | C | 40.19     |
| 14    | ABI IL 14 | G | C | U | C | U | U | 39.45     |
| 15    | ABI IL 15 | G | G | A | G | C | C | 36.91     |
| 16    | ABI IL 16 | C | G | A | C | C | C | 36.60     |
| 17    | ABI IL 17 | A | A | A | G | C | C | 35.95     |
| 18    | ABI IL 18 | A | C | A | U | U | C | 32.39     |

|    |            |   |   |   |   |   |   |       |
|----|------------|---|---|---|---|---|---|-------|
| 19 | AB I IL 19 | G | G | A | C | A | C | 31.98 |
| 20 | AB I IL 20 | G | A | C | U | G | G | 31.04 |
| 21 | AB I IL 21 | G | A | G | C | C | A | 29.34 |
| 22 | AB I IL 22 | U | C | G | G | G | G | 27.37 |
| 23 | AB I IL 23 | C | G | A | C | U | C | 25.53 |
| 24 | AB I IL 24 | A | G | U | G | A | C | 25.29 |
| 25 | AB I IL 25 | G | A | U | U | G | G | 24.92 |
| 26 | AB I IL 26 | G | U | C | U | G | G | 24.86 |
| 27 | AB I IL 27 | U | C | U | G | G | G | 24.28 |
| 28 | AB I IL 28 | G | A | G | A | C | C | 23.16 |
| 29 | AB I IL 29 | G | A | A | G | C | A | 23.16 |
| 30 | AB I IL 30 | U | C | C | C | G | C | 22.98 |
| 31 | AB I IL 31 | G | U | U | U | G | C | 22.32 |
| 32 | AB I IL 32 | G | C | C | A | U | C | 20.96 |
| 33 | AB I IL 33 | A | U | G | C | A | C | 20.91 |
| 34 | AB I IL 34 | A | U | U | U | C | C | 20.42 |
| 35 | AB I IL 35 | A | U | A | C | A | G | 19.80 |
| 36 | AB I IL 36 | U | A | U | A | A | C | 19.35 |
| 37 | AB I IL 37 | G | U | C | A | G | C | 19.17 |
| 38 | AB I IL 38 | G | G | U | G | C | U | 18.87 |
| 39 | AB I IL 39 | G | G | G | A | U | C | 18.76 |
| 40 | AB I IL 40 | A | C | U | U | G | C | 18.64 |
| 41 | AB I IL 41 | A | U | A | G | U | G | 17.61 |
| 42 | AB I IL 42 | A | U | C | A | C | C | 17.33 |
| 43 | AB I IL 43 | A | U | A | U | A | G | 16.71 |
| 44 | AB I IL 44 | G | C | U | G | G | A | 16.68 |
| 45 | AB I IL 45 | A | C | C | A | U | U | 14.16 |
| 46 | AB I IL 46 | C | A | A | A | C | C | 13.71 |
| 47 | AB I IL 47 | C | U | U | C | A | C | 13.30 |
| 48 | AB I IL 48 | A | C | A | A | U | A | 11.07 |
| 49 | AB I IL 49 | G | A | C | U | A | A | 10.83 |
| 50 | AB I IL 50 | U | G | U | A | A | U | 10.53 |
| 51 | AB I IL 51 | C | C | A | C | C | G | 8.87  |
| 52 | AB I IL 52 | C | C | G | G | A | A | 8.38  |
| 53 | AB I IL 53 | G | U | U | G | A | A | 8.21  |
| 54 | AB I IL 54 | G | U | A | A | C | G | 6.85  |
| 55 | AB I IL 55 | U | U | G | A | A | C | 6.14  |
| 56 | AB I IL 56 | U | U | G | G | G | U | 5.78  |
| 57 | AB I IL 57 | C | C | C | C | A | G | 5.78  |
| 58 | AB I IL 58 | A | G | C | U | U | U | 5.29  |
| 59 | AB I IL 59 | A | G | G | C | U | A | 5.29  |



|    |            |   |   |   |   |   |   |      |
|----|------------|---|---|---|---|---|---|------|
| 60 | AB I IL 60 | C | C | U | G | U | A | 5.29 |
| 61 | AB I IL 61 | G | A | C | G | A | U | 5.06 |
| 62 | AB I IL 62 | A | G | C | G | C | G | 4.88 |
| 63 | AB I IL 63 | C | C | G | U | G | A | 3.09 |
| 64 | AB I IL 64 | U | G | A | A | G | A | 3.09 |
| 65 | AB I IL 65 | C | A | C | C | U | A | 3.09 |
| 66 | AB I IL 66 | C | A | C | U | U | U | 3.09 |
| 67 | AB I IL 67 | U | A | G | A | G | A | 3.09 |
| 68 | AB I IL 68 | U | A | A | C | C | G | 2.68 |
| 69 | AB I IL 69 | U | G | G | G | C | A | 2.68 |
| 70 | AB I IL 70 | G | G | G | U | A | U | 1.97 |
| 71 | AB I IL 71 | C | A | C | G | G | G | 0.00 |

**Table S-2:** Sequences of all selected loops for **ABII** and their corresponding sum Z-scores. The position where each nucleotide occurs is indicated in secondary structure of **1** above.

| S. No | Loop        | 1 | 2 | 3 | 4 | 5 | 6 | $\Sigma$ Z-Score |
|-------|-------------|---|---|---|---|---|---|------------------|
| 1     | AB II IL 1  | C | A | A | G | G | C | 108.7257         |
| 2     | AB II IL 2  | A | C | A | C | G | C | 90.45831         |
| 3     | AB II IL 2  | A | C | A | C | G | C | 90.45831         |
| 4     | AB II IL 3  | A | C | A | G | G | C | 127.0134         |
| 5     | AB II IL 4  | U | A | U | C | C | C | 99.50588         |
| 6     | AB II IL 5  | A | C | U | U | G | C | 83.68124         |
| 7     | AB II IL 6  | U | A | U | C | C | C | 99.50588         |
| 8     | AB II IL 7  | A | C | U | U | G | C | 83.68124         |
| 9     | AB II IL 8  | A | C | A | C | C | C | 75.81603         |
| 10    | AB II IL 9  | C | C | A | U | G | C | 70.51098         |
| 11    | AB II IL 10 | A | C | G | G | C | C | 70.49602         |
| 12    | AB II IL 11 | A | C | A | G | U | C | 68.58954         |
| 13    | AB II IL 12 | A | A | U | C | C | C | 66.36061         |
| 14    | AB II IL 13 | A | C | G | U | C | C | 64.37825         |
| 15    | AB II IL 14 | C | U | G | G | G | C | 64.08398         |
| 16    | AB II IL 15 | C | A | G | G | G | A | 63.68153         |
| 17    | AB II IL 16 | A | C | A | G | G | U | 58.85229         |
| 18    | AB II IL 17 | C | U | G | G | G | A | 53.8375          |
| 19    | AB II IL 18 | U | G | U | C | C | G | 53.66045         |
| 20    | AB II IL 19 | C | C | G | G | G | A | 52.30268         |
| 21    | AB II IL 20 | U | C | G | C | C | C | 52.09154         |
| 22    | AB II IL 21 | C | C | U | U | C | C | 46.2309          |
| 23    | AB II IL 22 | A | U | C | C | C | G | 46.15653         |
| 24    | AB II IL 23 | C | A | C | G | A | C | 43.56854         |
| 25    | AB II IL 24 | C | C | C | C | G | C | 42.99221         |
| 26    | AB II IL 25 | C | U | C | C | C | C | 42.31909         |
| 27    | AB II IL 26 | U | G | U | G | C | G | 39.80401         |
| 28    | AB II IL 27 | U | A | C | G | A | C | 38.73227         |
| 29    | AB II IL 28 | A | U | U | G | C | G | 38.62622         |
| 30    | AB II IL 29 | C | A | G | U | G | C | 36.80919         |
| 31    | AB II IL 30 | G | G | U | C | C | G | 36.72488         |
| 32    | AB II IL 31 | C | C | U | C | A | C | 34.11721         |
| 33    | AB II IL 32 | A | U | C | G | U | G | 33.19806         |
| 34    | AB II IL 33 | A | A | C | G | U | C | 32.81723         |
| 35    | AB II IL 34 | U | U | C | C | C | A | 30.59095         |
| 36    | AB II IL 35 | A | U | U | A | C | G | 30.54924         |
| 37    | AB II IL 36 | U | U | C | G | C | G | 29.93345         |

|    |             |   |   |   |   |   |   |          |
|----|-------------|---|---|---|---|---|---|----------|
| 38 | AB II IL 37 | C | U | C | U | U | G | 29.17484 |
| 39 | AB II IL 38 | G | C | C | G | C | C | 28.59302 |
| 40 | AB II IL 39 | U | A | A | G | G | G | 28.44814 |
| 41 | AB II IL 40 | C | G | A | C | C | C | 27.62759 |
| 42 | AB II IL 41 | A | C | G | U | G | U | 26.32669 |
| 43 | AB II IL 42 | C | U | C | U | U | A | 25.84852 |
| 44 | AB II IL 43 | G | U | G | C | C | G | 25.24977 |
| 45 | AB II IL 44 | U | A | C | U | A | C | 23.38641 |
| 46 | AB II IL 45 | C | U | C | G | U | U | 23.19288 |
| 47 | AB II IL 46 | A | C | U | G | U | A | 22.83427 |
| 48 | AB II IL 47 | C | C | U | C | C | U | 21.60898 |
| 49 | AB II IL 48 | C | A | G | G | C | G | 19.73308 |
| 50 | AB II IL 49 | A | C | U | A | C | A | 19.00961 |
| 51 | AB II IL 50 | C | U | U | A | G | C | 18.79137 |
| 52 | AB II IL 51 | G | A | G | U | C | C | 18.54762 |
| 53 | AB II IL 52 | U | C | A | C | C | A | 18.3637  |
| 54 | AB II IL 53 | A | U | C | G | G | U | 16.15647 |
| 55 | AB II IL 54 | G | U | C | C | G | G | 13.96435 |
| 56 | AB II IL 55 | G | A | C | U | C | G | 13.27155 |
| 57 | AB II IL 56 | U | C | U | G | G | U | 12.68937 |
| 58 | AB II IL 57 | U | G | C | A | A | G | 11.17    |
| 59 | AB II IL 58 | U | G | C | A | G | G | 11.17    |
| 60 | AB II IL 59 | U | A | A | G | U | U | 10.9789  |
| 61 | AB II IL 60 | U | A | A | C | U | A | 10.73233 |
| 62 | AB II IL 61 | C | G | C | U | U | A | 10.71936 |
| 63 | AB II IL 62 | G | A | A | A | C | G | 10.36964 |
| 64 | AB II IL 63 | G | G | A | C | G | G | 10.18376 |
| 65 | AB II IL 64 | C | G | C | C | U | G | 8.692479 |
| 66 | AB II IL 65 | A | G | A | C | G | A | 8.581568 |
| 67 | AB II IL 66 | A | A | A | A | G | G | 8.143905 |
| 68 | AB II IL 67 | U | A | C | C | G | A | 7.830417 |
| 69 | AB II IL 68 | U | G | A | G | C | U | 7.808588 |
| 70 | AB II IL 69 | U | C | G | G | A | G | 7.528411 |
| 71 | AB II IL 70 | G | C | A | G | A | G | 7.528411 |
| 72 | AB II IL 71 | A | C | C | U | A | A | 7.03778  |
| 73 | AB II IL 72 | A | U | C | A | A | A | 5.271867 |
| 74 | AB II IL 73 | U | G | C | G | U | A | 5.175071 |
| 75 | AB II IL 74 | A | U | A | U | A | G | 3.326313 |
| 76 | AB II IL 75 | G | G | G | G | A | G | 2.710819 |
| 77 | AB II IL 76 | U | U | U | C | G | U | 2.464251 |
| 78 | AB II IL 77 | G | A | A | U | A | A | 0        |

**Table S-3:** Sequences of all selected loops for **ABIII** and their corresponding sum Z-scores. The position where each nucleotide occurs is indicated in secondary structure of **1** above.

| S. No | Loop         | 1 | 2 | 3 | 4 | 5 | 6 | $\Sigma$ Z-Score |
|-------|--------------|---|---|---|---|---|---|------------------|
| 1     | AB III IL 1  | U | U | U | G | C | G | 167.2105         |
| 2     | AB III IL 1  | U | U | U | G | C | G | 167.2105         |
| 3     | AB III IL 1  | U | U | U | G | C | G | 167.2105         |
| 4     | AB III IL 3  | C | C | C | C | G | C | 132.6968         |
| 5     | AB III IL 4  | C | A | C | C | G | C | 118.8408         |
| 6     | AB III IL 5  | C | C | C | C | G | G | 110.1144         |
| 7     | AB III IL 6  | C | C | C | C | G | A | 102.5067         |
| 8     | AB III IL 7  | G | C | C | C | U | G | 102.1979         |
| 9     | AB III IL 8  | C | U | C | U | G | C | 97.97974         |
| 10    | AB III IL 9  | C | C | U | G | C | C | 95.47503         |
| 11    | AB III IL 10 | A | U | U | G | C | C | 94.61297         |
| 12    | AB III IL 11 | C | A | C | G | G | C | 82.70202         |
| 13    | AB III IL 12 | G | A | U | G | C | C | 77.27151         |
| 14    | AB III IL 13 | C | C | A | G | C | C | 65.41424         |
| 15    | AB III IL 14 | A | A | U | G | C | G | 64.08981         |
| 16    | AB III IL 15 | A | A | A | G | C | C | 61.5774          |
| 17    | AB III IL 16 | A | U | A | G | C | G | 58.59703         |
| 18    | AB III IL 17 | G | C | G | G | C | C | 56.31616         |
| 19    | AB III IL 18 | A | C | C | C | U | G | 55.60781         |
| 20    | AB III IL 19 | G | A | C | C | U | G | 53.58299         |
| 21    | AB III IL 20 | U | C | U | C | C | C | 51.0001          |
| 22    | AB III IL 21 | C | U | C | U | G | G | 50.68067         |
| 23    | AB III IL 22 | C | U | C | U | U | C | 49.12005         |
| 24    | AB III IL 23 | A | A | U | G | A | C | 48.27477         |
| 25    | AB III IL 24 | C | A | G | U | G | C | 42.30723         |
| 26    | AB III IL 25 | C | C | C | C | A | U | 40.33884         |
| 27    | AB III IL 26 | G | C | U | C | G | G | 39.32911         |
| 28    | AB III IL 27 | A | A | C | C | G | A | 38.21291         |
| 29    | AB III IL 28 | A | A | C | C | U | C | 38.07573         |
| 30    | AB III IL 29 | G | G | C | C | G | G | 36.39911         |
| 31    | AB III IL 30 | G | C | A | G | G | C | 35.27423         |
| 32    | AB III IL 31 | G | G | U | G | G | C | 34.65379         |
| 33    | AB III IL 32 | G | C | C | U | U | C | 32.87606         |
| 34    | AB III IL 33 | U | A | U | C | G | C | 31.3478          |
| 35    | AB III IL 34 | U | U | C | A | C | G | 29.29945         |

|    |              |   |   |   |   |   |   |          |
|----|--------------|---|---|---|---|---|---|----------|
| 36 | AB III IL 35 | A | G | A | C | C | C | 28.7186  |
| 37 | AB III IL 36 | G | U | A | C | C | G | 28.20733 |
| 38 | AB III IL 37 | C | C | U | C | C | U | 28.15913 |
| 39 | AB III IL 38 | U | G | A | C | C | C | 25.58265 |
| 40 | AB III IL 39 | A | C | C | A | G | A | 24.84736 |
| 41 | AB III IL 40 | G | C | U | G | A | G | 22.28189 |
| 42 | AB III IL 41 | G | U | U | A | C | A | 22.02245 |
| 43 | AB III IL 42 | U | C | C | U | G | A | 21.36464 |
| 44 | AB III IL 43 | G | C | G | C | U | U | 20.68479 |
| 45 | AB III IL 44 | A | C | G | A | C | C | 19.41213 |
| 46 | AB III IL 45 | U | G | U | U | G | C | 17.2434  |
| 47 | AB III IL 46 | C | G | G | U | A | C | 15.96144 |
| 48 | AB III IL 47 | G | G | C | U | A | C | 11.95376 |
| 49 | AB III IL 48 | G | C | U | A | U | A | 11.56154 |
| 50 | AB III IL 49 | G | U | A | A | U | G | 10.03327 |
| 51 | AB III IL 50 | G | C | A | C | A | A | 9.800836 |
| 52 | AB III IL 51 | G | U | G | U | C | A | 8.948716 |
| 53 | AB III IL 52 | C | U | A | A | C | A | 7.598639 |
| 54 | AB III IL 53 | U | G | G | U | A | G | 3.482721 |
| 55 | AB III IL 54 | A | U | G | G | U | U | 2.132644 |
| 56 | AB III IL 55 | U | U | G | A | U | A | 0        |
| 57 | AB III IL 56 | C | G | G | G | U | G | 0        |
| 58 | AB III IL 57 | C | U | A | G | A | U | 0        |
| 59 | AB III IL 58 | C | A | U | U | A | A | 0        |

**Table S-4:** Sequences of all selected loops for **ABIV** and their corresponding sum Z-scores. The position where each nucleotide occurs is indicated in secondary structure of **1** above.

| S. No | Loop        | 1 | 2 | 3 | 4 | 5 | 6 | $\Sigma$ Z-Score |
|-------|-------------|---|---|---|---|---|---|------------------|
| 1     | AB IV IL 1  | C | A | C | C | C | C | 242.2054         |
| 2     | AB IV IL 1  | C | A | C | C | C | C | 242.2054         |
| 3     | AB IV IL 2  | G | C | C | C | C | C | 202.111          |
| 4     | AB IV IL 3  | C | C | C | C | G | C | 181.8436         |
| 5     | AB IV IL 4  | A | A | C | C | C | C | 173.9718         |
| 6     | AB IV IL 5  | U | C | C | C | C | C | 172.1775         |
| 7     | AB IV IL 6  | C | C | A | C | C | C | 154.7534         |
| 8     | AB IV IL 7  | C | G | C | C | C | C | 148.835          |
| 9     | AB IV IL 8  | A | C | A | C | C | C | 143.1652         |
| 10    | AB IV IL 9  | G | C | C | C | C | A | 133.8437         |
| 11    | AB IV IL 10 | C | A | C | C | C | A | 128.9347         |
| 12    | AB IV IL 11 | A | C | A | C | C | U | 126.7522         |
| 13    | AB IV IL 12 | A | C | A | C | C | U | 126.7522         |
| 14    | AB IV IL 13 | G | A | C | C | G | C | 121.3406         |
| 15    | AB IV IL 14 | G | C | C | A | G | C | 111.7298         |
| 16    | AB IV IL 15 | G | A | A | C | C | U | 109.5441         |
| 17    | AB IV IL 16 | G | A | A | C | C | U | 109.5441         |
| 18    | AB IV IL 17 | C | C | C | A | U | C | 105.1149         |
| 19    | AB IV IL 18 | U | C | C | C | C | A | 103.9101         |
| 20    | AB IV IL 19 | C | C | C | C | G | U | 102.0903         |
| 21    | AB IV IL 20 | C | C | C | C | U | G | 95.94266         |
| 22    | AB IV IL 21 | G | C | C | C | G | G | 92.61426         |
| 23    | AB IV IL 22 | G | C | C | A | U | G | 83.67924         |
| 24    | AB IV IL 23 | C | C | U | C | G | C | 78.26131         |
| 25    | AB IV IL 24 | C | C | U | A | C | C | 76.16101         |
| 26    | AB IV IL 25 | A | C | C | A | U | G | 75.54361         |
| 27    | AB IV IL 26 | G | A | C | G | G | C | 73.75705         |
| 28    | AB IV IL 27 | C | C | C | G | C | U | 72.02102         |
| 29    | AB IV IL 28 | C | C | C | A | A | G | 71.77256         |
| 30    | AB IV IL 29 | A | A | C | A | G | C | 67.86459         |
| 31    | AB IV IL 30 | A | C | C | U | U | C | 67.73314         |
| 32    | AB IV IL 31 | C | C | A | A | C | G | 65.81675         |
| 33    | AB IV IL 32 | A | C | C | U | A | C | 63.8935          |
| 34    | AB IV IL 33 | U | A | C | G | C | C | 61.9152          |
| 35    | AB IV IL 34 | A | A | A | U | C | C | 60.53193         |
| 36    | AB IV IL 35 | C | C | G | A | C | U | 55.41654         |
| 37    | AB IV IL 36 | C | C | G | A | U | G | 53.45111         |

|    |             |   |   |   |   |   |   |          |
|----|-------------|---|---|---|---|---|---|----------|
| 38 | AB IV IL 37 | A | G | C | A | C | C | 52.90231 |
| 39 | AB IV IL 38 | A | U | U | C | C | C | 51.07062 |
| 40 | AB IV IL 39 | G | G | A | C | C | A | 50.72157 |
| 41 | AB IV IL 40 | C | U | C | A | G | C | 50.42849 |
| 42 | AB IV IL 41 | G | C | C | U | G | U | 48.49781 |
| 43 | AB IV IL 42 | G | A | A | C | A | C | 42.11249 |
| 44 | AB IV IL 43 | G | C | U | A | C | A | 38.22589 |
| 45 | AB IV IL 44 | G | C | U | U | C | U | 37.76128 |
| 46 | AB IV IL 45 | G | C | A | G | C | G | 36.0352  |
| 47 | AB IV IL 46 | A | A | A | U | C | A | 32.46398 |
| 48 | AB IV IL 47 | U | C | G | U | G | C | 30.43735 |
| 49 | AB IV IL 48 | C | A | A | C | A | U | 27.59238 |
| 50 | AB IV IL 49 | A | G | G | U | G | C | 27.2205  |
| 51 | AB IV IL 50 | A | C | C | G | A | A | 23.98193 |
| 52 | AB IV IL 51 | G | U | C | G | C | A | 23.86896 |
| 53 | AB IV IL 52 | U | A | C | A | G | A | 21.48489 |
| 54 | AB IV IL 53 | G | G | G | U | G | C | 20.01644 |
| 55 | AB IV IL 54 | C | A | G | C | U | A | 16.62942 |
| 56 | AB IV IL 55 | A | C | G | U | G | U | 16.58814 |
| 57 | AB IV IL 56 | C | A | U | G | C | U | 15.5313  |
| 58 | AB IV IL 57 | A | U | G | U | A | C | 13.0502  |
| 59 | AB IV IL 58 | C | G | C | U | U | A | 8.4331   |
| 60 | AB IV IL 59 | U | U | G | G | C | U | 6.660679 |
| 61 | AB IV IL 60 | G | G | G | C | A | U | 5.532998 |
| 62 | AB IV IL 61 | G | A | U | G | G | G | 3.274131 |
| 63 | AB IV IL 62 | U | A | G | G | G | A | 3.274131 |
| 64 | AB IV IL 63 | A | G | A | A | U | G | 2.896678 |
| 65 | AB IV IL 64 | A | U | A | G | U | G | 0        |

**Table S-5:** Sequences of all selected loops for **ABV** and their corresponding sum Z-scores. The position where each nucleotide occurs is indicated in secondary structure of **1** above.

| S. No | Loop        | 1 | 2 | 3 | 4 | 5 | 6 | $\Sigma$ Z-Score |
|-------|-------------|---|---|---|---|---|---|------------------|
| 1     | AB II IL 1  | C | C | A | G | C | C | 140.814          |
| 2     | AB II IL 2  | C | C | A | G | G | C | 121.3676         |
| 3     | AB II IL 3  | G | C | A | G | C | C | 100.831          |
| 4     | AB II IL 4  | U | C | G | G | C | C | 94.48154         |
| 5     | AB II IL 5  | G | C | A | G | C | G | 89.77421         |
| 6     | AB II IL 6  | U | C | G | G | C | G | 87.41722         |
| 7     | AB II IL 7  | C | G | G | G | G | C | 79.1738          |
| 8     | AB II IL 7  | C | G | G | G | G | C | 79.1738          |
| 9     | AB II IL 8  | A | C | A | C | C | C | 78.78228         |
| 10    | AB II IL 9  | A | U | A | C | G | C | 76.58505         |
| 11    | AB II IL 10 | A | C | G | G | C | G | 73.45406         |
| 12    | AB II IL 11 | C | C | U | G | G | G | 69.61515         |
| 13    | AB II IL 12 | U | C | U | G | C | C | 66.77411         |
| 14    | AB II IL 13 | C | C | C | C | A | C | 66.66362         |
| 15    | AB II IL 14 | U | C | G | G | G | G | 65.91786         |
| 16    | AB II IL 15 | C | C | A | G | A | G | 65.40177         |
| 17    | AB II IL 16 | U | C | C | C | A | C | 64.52784         |
| 18    | AB II IL 17 | C | A | C | G | C | C | 63.31238         |
| 19    | AB II IL 18 | C | G | A | C | G | A | 61.59054         |
| 20    | AB II IL 19 | A | U | U | C | G | C | 60.83244         |
| 21    | AB II IL 20 | A | C | U | G | C | G | 59.41227         |
| 22    | AB II IL 21 | U | C | C | A | A | C | 58.6343          |
| 23    | AB II IL 22 | A | U | A | C | U | C | 58.10317         |
| 24    | AB II IL 23 | C | G | A | C | U | A | 56.34204         |
| 25    | AB II IL 24 | C | U | A | C | C | C | 55.42108         |
| 26    | AB II IL 25 | C | A | C | A | C | C | 54.12517         |
| 27    | AB II IL 26 | U | A | C | A | A | C | 54.00406         |
| 28    | AB II IL 27 | C | C | A | A | U | C | 53.10803         |
| 29    | AB II IL 28 | C | A | A | U | G | C | 52.69586         |
| 30    | AB II IL 29 | C | U | C | G | C | C | 52.5659          |
| 31    | AB II IL 30 | G | C | A | G | U | G | 50.92732         |
| 32    | AB II IL 31 | G | A | U | C | G | C | 49.52502         |
| 33    | AB II IL 32 | A | G | U | C | G | C | 47.52243         |
| 34    | AB II IL 33 | A | A | C | A | A | C | 46.54892         |
| 35    | AB II IL 34 | G | U | G | A | G | C | 46.53094         |
| 36    | AB II IL 35 | G | U | G | A | G | C | 46.53094         |
| 37    | AB II IL 36 | G | A | U | A | G | C | 43.16996         |



|    |             |   |   |   |   |   |   |          |
|----|-------------|---|---|---|---|---|---|----------|
| 38 | AB II IL 37 | C | A | A | G | G | G | 42.78958 |
| 39 | AB II IL 38 | A | C | U | C | A | C | 41.91104 |
| 40 | AB II IL 39 | C | C | U | U | G | G | 39.18691 |
| 41 | AB II IL 40 | C | G | C | A | G | A | 38.99532 |
| 42 | AB II IL 41 | C | G | C | A | G | A | 38.99532 |
| 43 | AB II IL 42 | U | C | G | G | G | A | 38.94698 |
| 44 | AB II IL 43 | C | G | A | U | A | C | 38.493   |
| 45 | AB II IL 44 | C | C | C | C | A | A | 35.41436 |
| 46 | AB II IL 45 | G | U | G | G | C | C | 35.22257 |
| 47 | AB II IL 46 | A | A | A | A | A | C | 34.37191 |
| 48 | AB II IL 47 | C | G | A | U | A | A | 33.17941 |
| 49 | AB II IL 48 | A | U | A | C | C | G | 30.42607 |
| 50 | AB II IL 49 | C | C | U | A | U | G | 29.50805 |
| 51 | AB II IL 50 | U | A | U | G | G | C | 29.48397 |
| 52 | AB II IL 51 | C | C | U | C | U | A | 28.69195 |
| 53 | AB II IL 52 | C | A | A | A | G | U | 28.34383 |
| 54 | AB II IL 53 | A | G | A | C | C | A | 27.93193 |
| 55 | AB II IL 54 | C | G | U | C | U | C | 27.05586 |
| 56 | AB II IL 55 | U | G | C | C | C | C | 25.60949 |
| 57 | AB II IL 56 | C | A | A | G | U | A | 25.19527 |
| 58 | AB II IL 57 | G | C | U | C | G | G | 23.49063 |
| 59 | AB II IL 58 | U | A | G | A | C | C | 22.60402 |
| 60 | AB II IL 59 | A | C | A | G | G | U | 22.57239 |
| 61 | AB II IL 60 | U | G | C | U | G | C | 22.08027 |
| 62 | AB II IL 61 | G | U | U | C | U | C | 21.62477 |
| 63 | AB II IL 62 | C | U | A | A | G | U | 21.32293 |
| 64 | AB II IL 63 | G | C | A | A | C | U | 19.98707 |
| 65 | AB II IL 64 | G | G | G | G | A | C | 18.55294 |
| 66 | AB II IL 65 | C | U | C | C | U | A | 17.90524 |
| 67 | AB II IL 66 | A | A | U | G | C | G | 16.95783 |
| 68 | AB II IL 67 | U | C | C | U | A | A | 12.91696 |
| 69 | AB II IL 68 | G | C | G | A | U | G | 10.8329  |
| 70 | AB II IL 69 | G | G | A | C | U | U | 8.034321 |
| 71 | AB II IL 70 | U | G | A | C | A | U | 8.034321 |
| 72 | AB II IL 71 | A | A | C | C | C | G | 5.855824 |
| 73 | AB II IL 72 | G | U | A | U | G | G | 4.550322 |
| 74 | AB II IL 73 | G | U | U | A | U | A | 2.927429 |
| 75 | AB II IL 74 | A | A | G | A | G | U | 2.275161 |
| 76 | AB II IL 75 | G | A | G | U | G | G | 2.275161 |
| 77 | AB II IL 76 | G | G | U | A | C | G | 0        |

## References

1. Smith, J. M., Gard, J., Cummings, W., Kanizsai, A., and Krchňák, V. (1999) Necklace-Coded Polymer-Supported Combinatorial Synthesis of 2-Arylaminoimidazoles, *J. Comb. Chem.* **1**, 368-370.
2. Carpenter, R. D., DeBerdt, P. B., Lam, K. S., and Kurth, M. J. (2006) Carbodiimide-Based Benzimidazole Library Method, *J. Comb. Chem.* **8**, 907-914.
3. Zuckermann, R. N., Kerr, J. M., Kent, S. B. H., and Moos, W. H. (1992) Efficient method for the preparation of peptoids [oligo(N-substituted glycines)] by submonomer solid-phase synthesis, *J. Am. Chem. Soc.* **114**, 10646-10647.
4. Vegas, A. J., Fuller, J. H., and Koehler, A. N. (2008) Small-molecule microarrays as tools in ligand discovery, *Chem. Soc. Rev.* **37**, 1385-1394.
5. Duffner, J. L., Clemons, P. A., and Koehler, A. N. (2007) A pipeline for ligand discovery using small-molecule microarrays, *Curr. Opin. Chem. Biol.* **11**, 74-82.
6. Hergenrother, P. J., Depew, K. M., and Schreiber, S. L. (2000) Small-molecule microarrays: Covalent attachment and screening of alcohol-containing small molecules on glass slides, *J. Am. Chem. Soc.* **122**, 7849-7850.
7. MacBeath, G., Koehler, A. N., and Schreiber, S. L. (1999) Printing small molecules as microarrays and detecting protein- ligand interactions en masse, *J. Am. Chem. Soc.* **121**, 7967-7968.
8. Childs-Disney, J. L., Wu, M., Pushechnikov, A., Aminova, O., and Disney, M. D. (2007) A small molecule microarray platform to select RNA internal loop-ligand interactions, *ACS Chem. Biol.* **2**, 745-754.
9. Lewis, W. G., Magallon, F. G., Fokin, V. V., and Finn, M. G. (2004) Discovery and characterization of catalysts for azide-alkyne cycloaddition by fluorescence quenching, *J. Am. Chem. Soc.* **126**, 9152-9153.
10. Labuda, L. P., Pushechnikov, A., and Disney, M. D. (2009) Small molecule microarrays of RNA-focused peptoids help identify inhibitors of a pathogenic group I intron, *ACS Chem. Biol.* **4**, 299-307.
11. Reux, B., Weber, V., Galmier, M.-J., Borel, M., Madesclaire, Madelmont, M., Jean-Claude, Debiton, E., and Coudert, P. (2008) Synthesis and cytotoxic properties of new fluorodeoxyglucose-coupled chlorambucil derivatives, *Bioorg. Med. Chem.* **16**, 5004-5020.
12. von Maltzahn, G., Ren, Y., Park, J.-H., Min, D.-H., Kotamraju, V. R., Jayakumar, J., Fogal, V., Sailor, M. J., Ruoslahti, E., and Bhatia, S. N. (2008) In vivo tumor cell targeting with "click" nanoparticles, *Bioconjugate Chem.* **19**, 1570-1578.
